# Supplementary material for: Iridium-catalyzed enantioselective direct vinylogous allylic alkylation of coumarins
Source: Royal Society of Chemistry journal article supplement (doi:10.1039/c8sc02041h), 2018-01-01
Supplement: c8sc02041h2.pdf [file c8sc02041h2.pdf]

## SUPPORTING INFORMATION: PART A

### Iridium-catalyzed enantioselective direct vinylogous allylic alkylation of coumarins

Rahul Sarkar, Sankash Mitra and Santanu Mukherjee\*

*Department of Organic Chemistry, Indian Institute of Science, Bangalore 560 012, INDIA*

\*Corresponding author: E-mail: sm@iisc.ac.in

|    |                                                                                                                             |      |
|----|-----------------------------------------------------------------------------------------------------------------------------|------|
| A. | General information                                                                                                         | S-2  |
| B. | Procedure for the synthesis of coumarins                                                                                    | S-3  |
| C. | Procedure for the synthesis of allyl carbonates                                                                             | S-4  |
| D. | Preliminary studies on direct enantioselective vinylogous $\gamma$ -allylic alkylation of coumarin <b>1a</b>                | S-4  |
| E. | Ligand and reaction conditions optimization for direct enantioselective vinylogous $\gamma$ -allylic alkylation of coumarin | S-5  |
| F. | General procedure for the preparation of racemic products                                                                   | S-8  |
| G. | Typical procedure for Ir-catalyzed enantioselective allylation of coumarins with allyl carbonates                           | S-8  |
| H. | Procedure for the preparation of <b>3ma</b>                                                                                 | S-22 |
| I. | Large scale synthesis of <b>3aa</b>                                                                                         | S-23 |
| J. | Procedure for the retro-Knoevenagel/hydrolysis reaction of <b>3aa</b>                                                       | S-23 |
| K. | Procedure for the epoxidation of <b>3aa</b>                                                                                 | S-24 |
| L. | Procedure for the selective reduction of the allylic double bond of <b>3aa</b>                                              | S-25 |
| M. | Procedure for the base-catalyzed cyclization of <b>6</b>                                                                    | S-26 |
| N. | Procedure for the cross-metathesis reaction of <b>3aa</b>                                                                   | S-27 |

## A. General information:

Infrared (FT-IR) spectra were recorded on a Bruker Alfa FT-IR,  $\nu_{\max}$  in  $\text{cm}^{-1}$  and the bands are characterized as broad (br), strong (s), medium (m), and weak (w). NMR spectra were recorded on Bruker Ultrashield spectrometer at 400 MHz (for  $^1\text{H-NMR}$ ) and 100 MHz (for  $^{13}\text{C-NMR}$ ). Chemical shifts are reported in ppm from tetramethylsilane with the solvent resonance as internal standard ( $\text{CDCl}_3$ :  $\delta$  7.26,  $\text{CD}_3\text{OD}$ :  $\delta$  3.31 for  $^1\text{H-NMR}$  and  $\text{CDCl}_3$ :  $\delta$  77.16,  $\text{CD}_3\text{OD}$ :  $\delta$  49.00 for  $^{13}\text{C-NMR}$ ). For  $^1\text{H-NMR}$ , data are reported as follows: chemical shift, multiplicity (s = singlet, d = doublet, dd = double doublet, t = triplet, q = quartet, br = broad, m = multiplet), coupling constants (Hz) and integration. High resolution mass spectrometry was performed on Micromass Q-TOF Micro instrument. Optical rotations were measured on JASCO P-2000 polarimeter. Melting points were measured in open glass capillary using ANALAB  $\mu$ -Thermocal 10 melting point apparatus and the values are uncorrected. Enantiomeric ratios were determined by Shimadzu LC-20AD HPLC instrument and SPD-20A UV/Vis detector using stationary phase chiral columns (25 cm  $\times$  0.46 cm) in comparison with authentic racemic compounds.

Unless stated otherwise, all reactions were carried out with distilled and dried solvents under an atmosphere of nitrogen or argon in oven (120  $^\circ\text{C}$ ) dried glassware with standard vacuum-line techniques. Organic solvents used for carrying out reactions were dried using standard methods.  $[\text{Ir}(\text{COD})\text{Cl}]_2$ , (*S*)-BINOL and (*R*)-BINOL were purchased from Combi-Blocks; (–)-bis[*(S)*-1-phenylethyl]amine was purchased from Alfa Aesar and used as received. All work up and purification were carried out with reagent grade solvents in air. Thin-layer chromatography was performed using Merck silica gel 60 F<sub>254</sub> pre-coated plates (0.25 mm). Column chromatography was performed using silica gel (230-400 or 100-200 mesh). NMR yields were determined by using mesitylene as an internal standard. Unless otherwise noted, all reported yields of the Ir-catalyzed allylation reactions are isolated yields. Chiral ligands used in this work were prepared according to literature procedures.<sup>1</sup>

---

<sup>1</sup> a) L. A. Arnold, R. Imbos, A. Mandoli, A. H. M. de Vries, R. Naasz and B. L. Feringa, *Tetrahedron* 2000, **56**, 2865-2878; b) D. Polet and A. Alexakis, *Org. Lett.* 2005, **7**, 1621-1624; c) C. Defieber, M. A. Ariger, P. Moriel and E. M. Carreira, *Angew. Chem., Int. Ed.* 2007, **46**, 3139-3143.

## B. Procedure for the synthesis of coumarins:

Substituted coumarins (**1a-o**) were prepared according to the previously reported procedure.<sup>2</sup>

### Preparation of coumarin (**1k**):

Coumarins (**1k-l**) were prepared according to the previously reported procedure.<sup>2</sup>

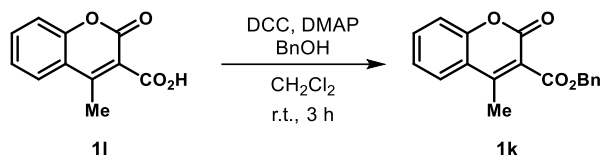

In an oven dried 10 mL round-bottom flask, **1l** (100 mg, 0.490 mmol, 1.0 equiv.) was taken along with benzyl alcohol (80 mg, 0.735 mmol, 1.5 equiv.) in 1.6 mL of absolute  $\text{CH}_2\text{Cl}_2$  at r.t. To this, DCC (111 mg, 0.540 mmol, 1.1 equiv.) and DMAP (6 mg, 0.050 mmol, 10 mol%) were added and the resulting solution was stirred at r.t. for 3 h. Solvent was removed under reduced pressure and the residue was purified by silica-gel flash column chromatography ( $\text{CH}_2\text{Cl}_2$ ) to obtain **1k** as a colorless thick oil (123 mg, 0.418 mmol, 85% yield); **FT-IR (Thin film)**: 1726 (s), 1609 (m), 1239 (s), 1024 (m);  **$^1\text{H-NMR}$  (400 MHz,  $\text{CDCl}_3$ )**:  $\delta$  7.60 (d,  $J = 7.9$  Hz, 1H), 7.55-7.51 (m, 1H), 7.44-7.42 (m, 2H), 7.37-7.26 (m, 5H), 5.37 (s, 2H), 2.36 (s, 3H);  **$^{13}\text{C-NMR}$  (100 MHz,  $\text{CDCl}_3$ )**:  $\delta$  164.7, 157.7, 152.8, 150.6, 135.1, 132.9, 128.6, 128.5, 128.4, 125.4, 124.8, 119.0, 117.1, 67.8, 16.0; **HRMS (ESI+)**: Calcd. for  $\text{C}_{18}\text{H}_{14}\text{O}_4\text{Na}$  ( $[\text{M}+\text{Na}]^+$ ): 317.0790, Found: 317.0792.

**Compound 1n: 1l** (200 mg, 0.980 mmol, 1.0 equiv.), reaction time 21 h, purified by silica-gel flash column chromatography (10% EtOAc in petroleum ether); colorless thick oil (181 mg, 0.565 mmol, 58% yield); **FT-IR (Thin film)**: 2924 (w), 2337 (m), 1723 (s), 1606 (m), 1239 (s);  **$^1\text{H-NMR}$  (400 MHz,  $\text{CDCl}_3$ )**:  $\delta$  7.62 (d,  $J = 8.0$  Hz, 1H), 7.56-7.52 (m, 1H), 7.38 (d,  $J = 7.3$  Hz, 2H), 7.31-7.22 (m, 5H), 6.76 (d,  $J = 15.9$  Hz, 1H), 6.36 (dt,  $J = 15.9, 6.4$  Hz, 1H), 5.01 (d,  $J = 6.4$  Hz, 2H), 2.44 (s, 3H);  **$^{13}\text{C-NMR}$  (100 MHz,  $\text{CDCl}_3$ )**:  $\delta$  164.6, 157.7, 152.8, 150.5, 135.9, 135.0, 132.8, 128.6, 128.2, 126.6, 125.4, 124.7, 122.1, 120.9, 118.9, 117.0, 66.5, 16.1; **HRMS (ESI+)**: Calcd. for  $\text{C}_{20}\text{H}_{16}\text{O}_4\text{Na}$  ( $[\text{M}+\text{Na}]^+$ ): 343.0946, Found: 343.0949.

**Compound 1o: 1l** (67 mg, 0.328 mmol, 1.0 equiv.), reaction time 14 h, purified by silica-gel flash column chromatography (10% EtOAc in petroleum ether); colorless thick oil (59 mg, 0.242 mmol, 80% yield); **FT-IR (Thin film)**: 1725 (s), 1608 (m), 1239 (s), 1024 (m);  **$^1\text{H-NMR}$  (400 MHz,  $\text{CDCl}_3$ )**:  $\delta$  7.63 (d,  $J = 8.0$  Hz, 1H), 7.55-7.51 (m, 1H), 7.31-7.25 (m, 2H), 6.03-5.92 (m, 1H), 5.42 (d,  $J = 17.2$  Hz, 1H), 5.27 (d,  $J = 10.4$  Hz, 1H), 4.82 (d,  $J = 5.8$  Hz, 2H), 2.43 (s, 3H);  **$^{13}\text{C-NMR}$  (100 MHz,  $\text{CDCl}_3$ )**:  $\delta$  164.5, 157.7, 152.9, 150.6, 132.9, 131.3, 125.5, 124.8, 121.0, 119.4, 119.1, 117.1, 66.6, 16.1; **HRMS (ESI+)**: Calcd. for  $\text{C}_{14}\text{H}_{12}\text{O}_4\text{Na}$  ( $[\text{M}+\text{Na}]^+$ ): 267.0633, Found: 267.0640.

<sup>2</sup> C. C. J. Loh, M. Schmid, B. Peters, X. Fang and M. Lautens, *Angew. Chem., Int. Ed.* 2016, **55**, 4600-4604.

### C. Procedure for the synthesis of allyl carbonates:

Allyl carbonates (**2a-u**, **2a'**) were prepared according to the previously reported procedure.<sup>3</sup>

### D. Preliminary studies on direct enantioselective vinylogous $\gamma$ -allylic alkylation of coumarin **1a**:

■ Reactions with branched allyl carbonate (**2a'**):

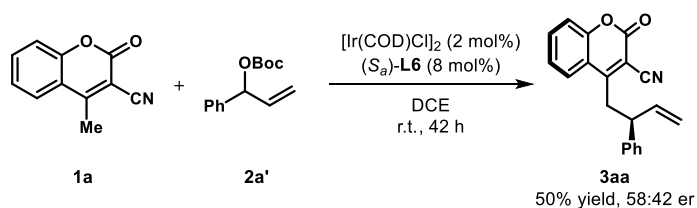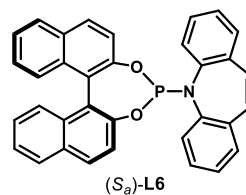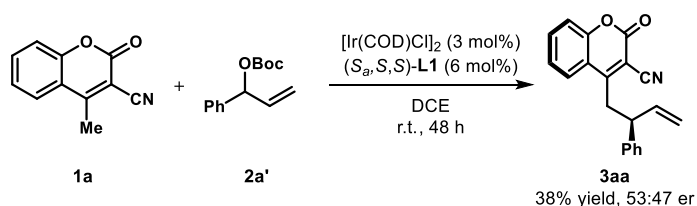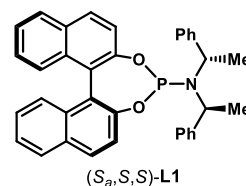

■ Reactions with linear allyl carbonate (**2a**):

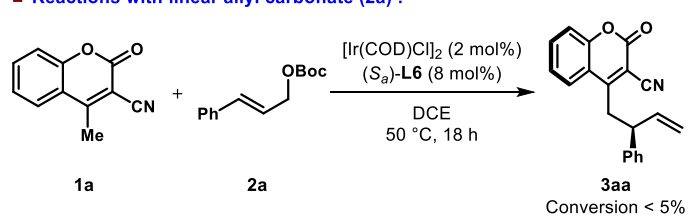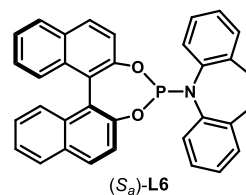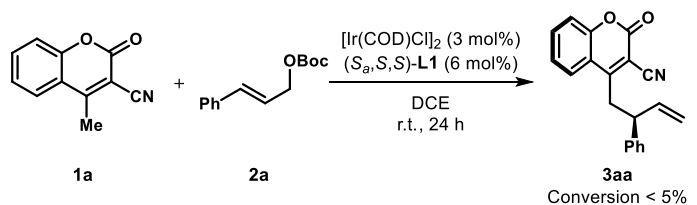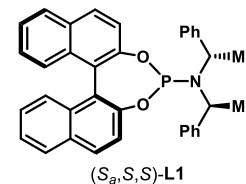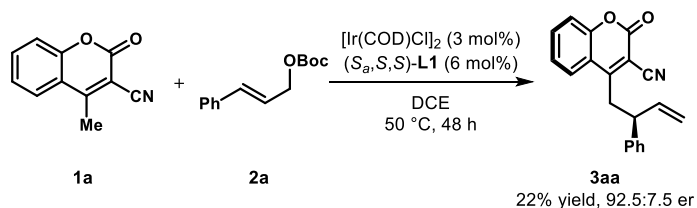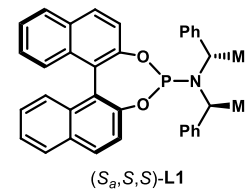

<sup>3</sup> a) L. M. Stanley, J. F. Hartwig, *Angew. Chem., Int. Ed.* 2009, **48**, 7841-7844; b) D. J. Weix, D. Marković, M. Ueda and J. F. Hartwig, *Org. Lett.* 2009, **11**, 2944-2947; c) J. Štambaský, A. V. Malkov and P. Kočovský, *J. Org. Chem.* 2008, **73**, 9148-9150.

**E. Ligand and reaction conditions optimization for direct enantioselective vinylogous  $\gamma$ -allylic alkylation of coumarin:**
**Table 1: Optimization of base<sup>a</sup>**
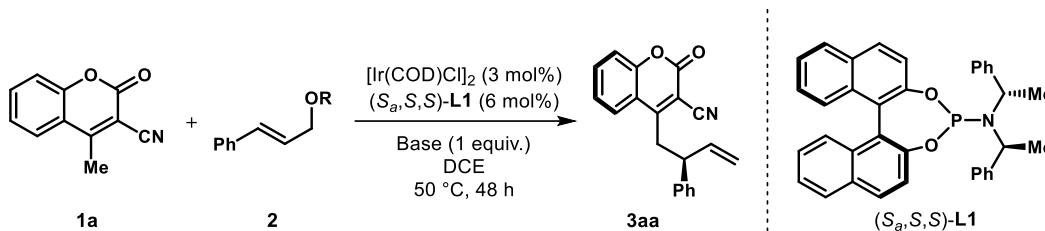

| entry           | R                      | ligand    | base                          | yield (%) <sup>b</sup> | er       |
|-----------------|------------------------|-----------|-------------------------------|------------------------|----------|
| 1               | Boc                    | <b>L1</b> | -                             | (22)                   | 92.5:7.5 |
| 2               | Boc                    | <b>L1</b> | $\text{Cs}_2\text{CO}_3$      | <5                     | n.d.     |
| 3               | Boc                    | <b>L1</b> | $\text{KO}t\text{-Bu}$        | <5                     | n.d.     |
| 4               | Boc                    | <b>L1</b> | DBU                           | <5                     | n.d.     |
| 5               | Boc                    | <b>L1</b> | <i>i</i> -Pr <sub>2</sub> NEt | 72                     | 96:4     |
| 6 <sup>c</sup>  | Boc                    | <b>L1</b> | <i>i</i> -Pr <sub>2</sub> NEt | 25                     | 97:3     |
| 7 <sup>d</sup>  | Boc                    | <b>L1</b> | <i>i</i> -Pr <sub>2</sub> NEt | 75                     | 96:4     |
| 8               | Boc                    | <b>L1</b> | $\text{Et}_3\text{N}$         | 74                     | 97:3     |
| 9               | $\text{CO}_2\text{Me}$ | <b>L1</b> | <i>i</i> -Pr <sub>2</sub> NEt | 73                     | 95:5     |
| 10              | Boc                    | <b>L1</b> | <i>i</i> -Pr <sub>2</sub> NH  | 76                     | 97:3     |
| 11 <sup>e</sup> | Boc                    | <b>L1</b> | <i>i</i> -Pr <sub>2</sub> NH  | 33                     | 97:3     |
| 12              | Boc                    | <b>L1</b> | $\text{Et}_2\text{NH}$        | 4                      | n.d.     |
| 13              | Boc                    | <b>L1</b> | <i>i</i> -Bu <sub>2</sub> NH  | 23                     | 96:4     |
| 14              | Boc                    | <b>L1</b> | <i>n</i> -Pr <sub>2</sub> NH  | 34                     | 97:3     |
| 15              | Boc                    | <b>L1</b> | Piperidine                    | 24                     | 98:2     |
| 16              | Boc                    | <b>L1</b> | Pyrrolidine                   | 8                      | 98.5:1.5 |
| 17              | Boc                    | <b>L1</b> | DABCO                         | 84                     | 97.5:2.5 |
| 18              | Boc                    | <b>L1</b> | <i>n</i> -PrNH <sub>2</sub>   | 13                     | 96:4     |

<sup>a</sup>Reaction conditions: 3 mol%  $[\text{Ir}(\text{COD})\text{Cl}]_2$ , 6 mol% ligand, 0.240 mmol of **1a**, 0.200 mmol of **2** and 0.200 mmol of base in 0.6 mL DCE; The catalyst was prepared via *n*-PrNH<sub>2</sub> activation. <sup>b</sup>Yields were determined by <sup>1</sup>H-NMR spectroscopy with mesitylene as internal standard; Isolated yields are given in the parentheses. <sup>c</sup>Using 2.0 equiv. of base. <sup>d</sup>Using 1.2 equiv. of base. <sup>e</sup>Using 1.0 mL DCE as solvent. n.d. = Not determined.

**Table 2:** Ligand optimization<sup>a</sup>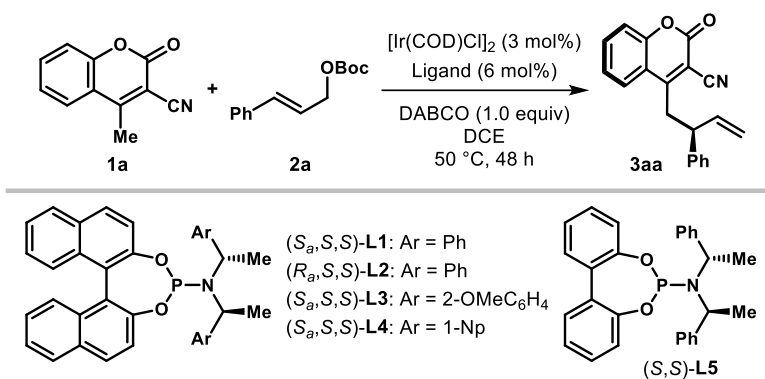

| entry | ligand | base                         | yield (%) <sup>b</sup> | er       |
|-------|--------|------------------------------|------------------------|----------|
| 1     | L1     | DABCO                        | 84                     | 97.5:2.5 |
| 2     | L2     | DABCO                        | n.r.                   | n.d.     |
| 3     | L3     | DABCO                        | 11                     | 98:2     |
| 4     | L4     | DABCO                        | n.r.                   | n.d.     |
| 5     | L5     | DABCO                        | 28                     | 92:8     |
| 6     | L3     | <i>i</i> -Pr <sub>2</sub> NH | 18                     | 97:3     |
| 7     | L4     | <i>i</i> -Pr <sub>2</sub> NH | 36                     | 97:3     |

<sup>a</sup>Reaction conditions: 3 mol%  $[\text{Ir}(\text{COD})\text{Cl}]_2$ , 6 mol% ligand, 0.240 mmol of **1a**, 0.200 mmol of **2a** and 0.200 mmol of base in 0.6 mL DCE; The catalyst was prepared via *n*-PrNH<sub>2</sub> activation. <sup>b</sup>Yields were determined by <sup>1</sup>H-NMR spectroscopy with mesitylene as internal standard. n.r. = No reaction; n.d. = Not determined.

**Table 3:** Solvent optimization<sup>a</sup>
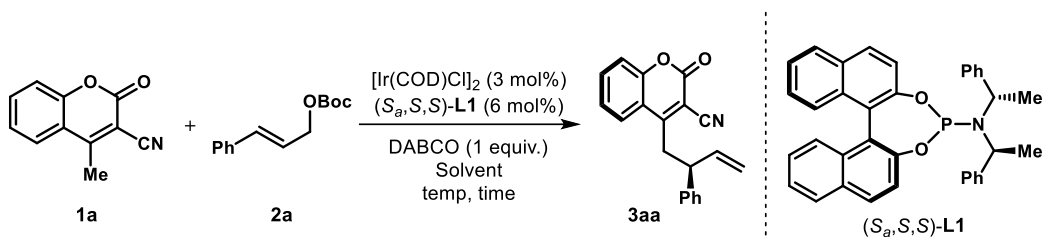

| entry           | Solvent                  | temp  | Time (h) | yield (%) <sup>b</sup> | er       |
|-----------------|--------------------------|-------|----------|------------------------|----------|
| 1               | DCE                      | 50 °C | 48       | 84                     | 97.5:2.5 |
| 2 <sup>c</sup>  | DCE                      | 50 °C | 48       | 23                     | 97.5:2.5 |
| 3 <sup>d</sup>  | DCE                      | 50 °C | 48       | 27                     | 98:2     |
| 4               | DCE                      | r.t.  | 48       | 35                     | 98:2     |
| 5 <sup>e</sup>  | DCE                      | 50 °C | 48       | 14                     | 97.5:2.5 |
| 6               | THF                      | 50 °C | 48       | 11                     | 96:4     |
| 7               | PhMe                     | 50 °C | 48       | <5                     | n.d.     |
| 8               | 1,4-dioxane              | 50 °C | 48       | 21                     | 96:4     |
| 9               | $\text{CHCl}_3$          | 50 °C | 48       | 67                     | 97:3     |
| 10              | $\text{CH}_2\text{Cl}_2$ | 50 °C | 36       | 88 (86%)               | 98:2     |
| 11 <sup>f</sup> | $\text{CH}_2\text{Cl}_2$ | 50 °C | 20       | 81                     | 97.5:2.5 |
| 12 <sup>g</sup> | $\text{CH}_2\text{Cl}_2$ | 50 °C | 36       | 64                     | 97.5:2.5 |
| 13              | PhCl                     | 50 °C | 48       | 24                     | 96:4     |
| 14              | $\text{CH}_3\text{CN}$   | 50 °C | 48       | 67                     | 96.5:3.5 |
| 15              | DMF                      | 50 °C | 48       | 39                     | 97:3     |

<sup>a</sup>Reaction conditions: 3 mol%  $[\text{Ir}(\text{COD})\text{Cl}]_2$ , 6 mol% ligand, 0.240 mmol of **1a**, 0.200 mmol of **2a** and 0.200 mmol of base in 0.6 mL DCE; The catalyst was prepared via *n*-PrNH<sub>2</sub> activation.

<sup>b</sup>Yields were determined by <sup>1</sup>H-NMR spectroscopy with mesitylene as internal standard; Isolated yields are given in the parentheses. <sup>c</sup>Using 0.5 mL DCE as solvent; <sup>d</sup>Using 1.0 mL DCE as solvent; <sup>e</sup>Using 2 mol%  $[\text{Ir}(\text{COD})\text{Cl}]_2$  and 4 mol% ligand; <sup>f</sup>Using 0.5 mL  $\text{CH}_2\text{Cl}_2$  as solvent; <sup>g</sup>Using 0.200 mmol of **1a**, 0.240 mmol of **2a**.

**F. General procedure for the preparation of racemic products (*rac*-3):**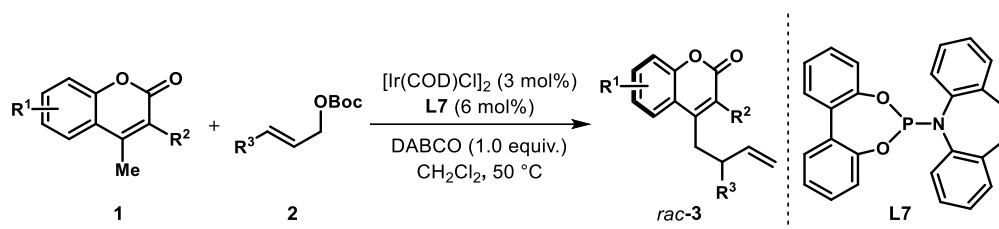

In a glass-vial  $[\text{Ir}(\text{COD})\text{Cl}]_2$  (0.003 mmol, 3 mol%) and ligand **L7** (0.006 mmol, 6 mol%) were taken with 0.2 mL of  $\text{CH}_2\text{Cl}_2$ , and the resulting solution was stirred at r.t. for 15 min. To this, was added **1** (0.120 mmol, 1.2 equiv.) followed by addition of **2** (0.100 mmol, 1.0 equiv.) in 0.1 mL  $\text{CH}_2\text{Cl}_2$ . The resulting suspension was stirred at  $50\text{ }^\circ\text{C}$  for 48 h. The crude mixture was purified by preparative TLC (Merck silica-gel 60 F<sub>254</sub> pre-coated plates of 0.25 mm thickness) to obtain the racemic  $\gamma$ -allylated products (*rac*-3).

**G. Typical procedure for Ir-catalyzed enantioselective allylation of coumarins with allyl carbonates:**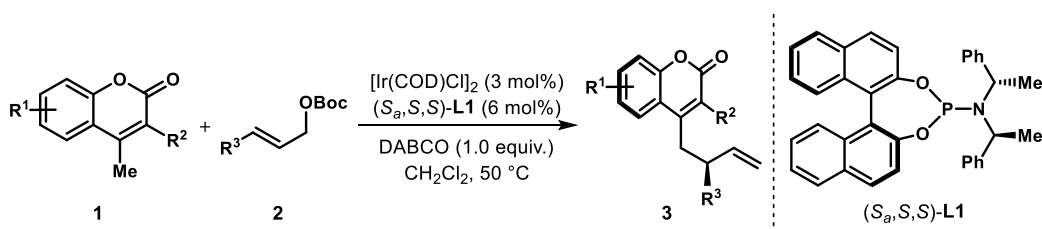

In an oven and vacuum-dried reaction tube,  $[\text{Ir}(\text{COD})\text{Cl}]_2$  (0.006 mmol, 3 mol%) and ligand (*S<sub>a</sub>,S,S*)-**L1** (0.012 mmol, 6 mol%) were taken with 0.5 mL of absolute THF under a positive argon pressure followed by addition of 0.3 mL dry *n*-PrNH<sub>2</sub>. The solution was heated at  $50\text{ }^\circ\text{C}$  for 30 min, after which all volatiles were removed under vacuum to obtain a yellow solid. To this, coumarin **1** (0.240 mmol, 1.2 equiv.) and DABCO (22.4 mg, 0.200 mmol, 1.0 equiv.) were introduced under a positive argon pressure followed by 0.4 mL of absolute  $\text{CH}_2\text{Cl}_2$  and the suspension was stirred at  $50\text{ }^\circ\text{C}$  for 5 min. After 5 min, a solution of allyl carbonate **2** (0.200 mmol, 1.0 equiv.) in 0.2 mL absolute  $\text{CH}_2\text{Cl}_2$  was added to it. The resulting mixture was purged with argon and the reaction tube was sealed with a glass stopper. The reaction was stirred at  $50\text{ }^\circ\text{C}$  until TLC (20% EtOAc in petroleum ether) revealed complete consumption of **2**. The reaction mixture was then allowed to attain ambient temperature, diluted with 2 mL of  $\text{CH}_2\text{Cl}_2$  and 5 mL of 1 N HCl solution. Organic layer was separated from the aqueous layer. The aqueous layer was extracted with  $\text{CH}_2\text{Cl}_2$  ( $3 \times 4\text{ mL}$ ). Combined organic layer was washed with brine (10 mL), dried over anhydrous  $\text{Na}_2\text{SO}_4$  and concentrated under reduced pressure to obtain a reddish-brown oil. The crude reaction mixture was purified by silica-gel flash column chromatography (7-10% EtOAc in petroleum ether) to obtain **3**.



**Compound 3aa:** Purified by silica-gel flash column chromatography (8% EtOAc in petroleum

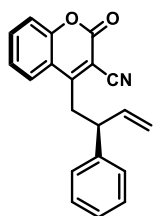

ether); Off-white solid (52 mg, 0.173 mmol, 86% yield); **m.p.** 148-150 °C; **FT-IR (Thin film):** 3028 (w), 2923 (w), 2229 (m), 1734 (s), 1602 (s), 1450 (m), 1366 (m); **<sup>1</sup>H-NMR (400 MHz, CDCl<sub>3</sub>):** δ 7.71-7.68 (m, 2H), 7.42-7.39 (m, 2H), 7.35-7.31 (m, 2H), 7.28-7.23 (m, 3H), 6.14 (ddd, *J* = 17.7, 10.0, 8.2 Hz, 1H), 5.13 (d, *J* = 10.1 Hz, 1H), 5.02 (d, *J* = 17.0 Hz, 1H), 3.74 (dd, *J* = 15.4, 7.8 Hz, 1H), 3.54 (dd, *J* = 12.8, 8.4 Hz, 1H), 3.46 (dd, *J* = 12.6, 6.9 Hz, 1H); **<sup>13</sup>C-NMR (100 MHz, CDCl<sub>3</sub>):** δ 164.0, 156.8, 153.6, 141.3, 138.6, 135.2, 129.1, 127.6, 127.4, 126.1, 125.5, 118.1, 117.5, 116.8, 113.7, 103.1, 50.6, 38.3; **HRMS (ESI<sup>+</sup>):** Calcd. for C<sub>20</sub>H<sub>15</sub>NO<sub>2</sub>Na ([M+Na]<sup>+</sup>): 324.1000, Found: 324.1000; The absolute configurations of **3aa** was assigned as (*S*) by comparing the specific rotation with the known compound.<sup>4</sup> **Optical rotation:** [α]<sub>D</sub><sup>22</sup> -6.0 (*c* 1.0, CHCl<sub>3</sub>) for an enantiomerically enriched sample with 98:2 er [Lit<sup>4</sup> +8.1 (*c* 1.0, CHCl<sub>3</sub>) for an enantiomerically enriched sample with 97:3 er]. The enantiomeric ratio was determined by HPLC analysis using Daicel Chiralpak IB column (90:10 *n*-Hexane/EtOH, 1.0 mL/min, 20 °C, 334 nm, τ<sub>major</sub> = 15.3 min, τ<sub>minor</sub> = 16.2 min). See Supporting Information: Part B for HPLC chromatograms.

**Compound 3ab:** Purified by silica-gel flash column chromatography (8% EtOAc in petroleum

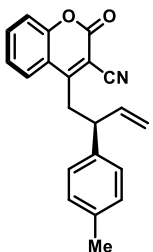

ether); Off-white solid (55 mg, 0.174 mmol, 87% yield); **m.p.** 154-156 °C; **FT-IR (Thin film):** 2921 (w), 2361 (w), 2229 (m), 1734 (s), 1603 (m), 1450 (m); **<sup>1</sup>H-NMR (400 MHz, CDCl<sub>3</sub>):** δ 7.73-7.68 (m, 2H), 7.43-7.39 (m, 2H), 7.15-7.11 (m, 4H), 6.16-6.07 (m, 1H), 5.09 (d, *J* = 10.1 Hz, 1H), 4.99 (d, *J* = 17.0 Hz, 1H), 3.70 (dd, *J* = 15.4, 7.8 Hz, 1H), 3.52 (dd, *J* = 12.8, 7.8 Hz, 1H), 3.44 (dd, *J* = 12.8, 6.8 Hz, 1H), 2.32 (s, 3H); **<sup>13</sup>C-NMR (100 MHz, CDCl<sub>3</sub>):** δ 164.0, 156.8, 153.6, 138.9, 138.3, 137.3, 135.1, 129.7, 127.2, 126.1, 125.5, 118.1, 117.5, 116.6, 113.7, 103.1, 50.3, 38.4, 21.1; **HRMS (ESI<sup>+</sup>):** Calcd. for C<sub>21</sub>H<sub>17</sub>NO<sub>2</sub>Na ([M+Na]<sup>+</sup>): 338.1157, Found: 338.1157; **Optical rotation:** [α]<sub>D</sub><sup>21</sup> -11.1 (*c* 1.0, CHCl<sub>3</sub>) for an enantiomerically enriched sample with 98:2 er. The enantiomeric ratio was determined by HPLC analysis using Daicel Chiralpak AS-H column (90:10 *n*-Hexane/EtOH, 1.0 mL/min, 20 °C, 298 nm, τ<sub>minor</sub> = 13.7 min, τ<sub>major</sub> = 15.2 min). See Supporting Information: Part B for HPLC chromatograms. The absolute stereochemistry of the product **3ab** was assigned in analogy with **3aa**.

<sup>4</sup> H. Xu, L. Larai, L. Schneider, K. Louven, C. Strohm, A. P. Antonchick and H. Waldmann, *Angew. Chem., Int. Ed.* 2017, **56**, 11232-11236.

**Compound 3ac:** Purified by silica-gel flash column chromatography (7% EtOAc in petroleum

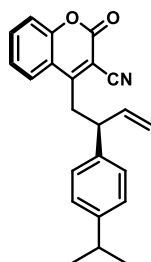

ether); Off-white solid (55 mg, 0.160 mmol, 80% yield); **m.p.** 138-140 °C; **FT-IR (Thin film):** 2921 (m), 2854 (m), 2371 (m), 2228 (w), 1735 (s), 1599 (s), 1365 (m), 1022 (m); **<sup>1</sup>H-NMR (400 MHz, CDCl<sub>3</sub>):** δ 7.70-7.66 (m, 2H), 7.40-7.36 (m, 2H), 7.20-7.15 (m, 4H), 6.17-6.08 (m, 1H), 5.09 (d, *J* = 10.1 Hz, 1H), 4.99 (d, *J* = 16.9 Hz, 1H), 3.73-3.68 (m, 1H), 3.54-3.49 (m, 1H), 3.44 (dd, *J* = 12.8, 6.6 Hz, 1H), 2.91-2.84 (m, 1H), 1.22 (d, *J* = 6.9 Hz, 6H); **<sup>13</sup>C-NMR (100 MHz, CDCl<sub>3</sub>):** δ 164.2, 156.8, 153.6, 148.3, 138.8, 138.7, 135.1, 127.2, 127.1, 126.1, 125.4, 118.0, 117.6, 116.7, 113.7, 103.1, 50.5, 38.4, 33.8, 24.1; **HRMS (ESI<sup>+</sup>):** Calcd. for C<sub>23</sub>H<sub>21</sub>NO<sub>2</sub>Na ([M+Na]<sup>+</sup>): 366.1470, Found: 366.1467; **Optical rotation:** [α]<sub>D</sub><sup>25</sup> -7.0 (*c* 2.0, CHCl<sub>3</sub>) for an enantiomerically enriched sample with 97.5:2.5 er. The enantiomeric ratio was determined by HPLC analysis using Daicel Chiralpak IA column (90:10 *n*-Hexane/EtOH, 1.0 mL/min, 20 °C, 214 nm, τ<sub>minor</sub> = 11.6 min, τ<sub>major</sub> = 13.6 min). See Supporting Information: Part B for HPLC chromatograms. The absolute stereochemistry of the product **3ac** was assigned in analogy with **3aa**.

**Compound 3ad:** Purified by silica-gel flash column chromatography (12% EtOAc in petroleum

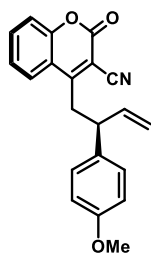

ether); Light yellow solid (66 mg, 0.198 mmol, 98% yield); **m.p.** 138-140 °C; **FT-IR (Thin film):** 2931 (w), 2362 (m), 2230 (m), 1734 (s), 1604 (s), 1512 (s), 1251 (s), 1034 (m); **<sup>1</sup>H-NMR (400 MHz, CDCl<sub>3</sub>):** δ 7.72-7.68 (m, 2H), 7.43-7.38 (m, 2H), 7.13 (d, *J* = 8.5 Hz, 2H), 6.84 (d, *J* = 8.5 Hz, 2H), 6.10 (ddd, *J* = 17.2, 9.9, 8.1 Hz, 1H), 5.09 (d, *J* = 10.0 Hz, 1H), 4.99 (d, *J* = 16.9 Hz, 1H), 3.77 (s, 3H), 3.73-3.67 (m, 1H), 3.53-3.47 (m, 1H), 3.45-3.40 (m, 1H); **<sup>13</sup>C-NMR (100 MHz, CDCl<sub>3</sub>):** δ 164.1, 158.9, 156.8, 153.6, 139.0, 135.1, 133.2, 128.4, 126.1, 125.5, 118.0, 117.5, 116.4, 114.4, 113.7, 103.0, 55.4, 49.8, 38.4; **HRMS (ESI<sup>+</sup>):** Calcd. for C<sub>21</sub>H<sub>17</sub>NO<sub>3</sub>Na ([M+Na]<sup>+</sup>): 354.1106, Found: 354.1108; **Optical rotation:** [α]<sub>D</sub><sup>23</sup> -30.4 (*c* 1.0, CHCl<sub>3</sub>) for an enantiomerically enriched sample with 98:2 er. The enantiomeric ratio was determined by HPLC analysis using Daicel Chiralpak IE column (90:10 *n*-Hexane/EtOH, 1.0 mL/min, 20 °C, 285 nm, τ<sub>minor</sub> = 47.1 min, τ<sub>major</sub> = 50.2 min). See Supporting Information: Part B for HPLC chromatograms. The absolute stereochemistry of the product **3ad** was assigned in analogy with **3aa**.

**Compound 3ae:** Purified by silica-gel flash column chromatography (10% EtOAc in petroleum

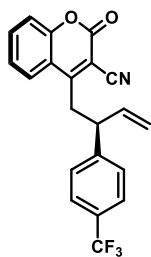

ether); Off-white solid (51 mg, 0.138 mmol, 69% yield); **m.p.** 159-161 °C; **FT-IR (Thin film):** 2229 (w), 1735 (s), 1603 (m), 1326 (s), 1121 (w), 1071 (m); **<sup>1</sup>H-NMR (400 MHz, CDCl<sub>3</sub>):** δ 7.73-7.67 (m, 2H), 7.59 (d, *J* = 7.7 Hz, 2H), 7.42-7.38 (m, 4H), 6.15-6.06 (m, 1H), 5.16 (d, *J* = 10.1 Hz, 1H), 5.04 (d, *J* = 16.9 Hz, 1H), 3.84-3.79 (m, 1H), 3.58-3.53 (m, 1H), 3.49-3.44 (m, 1H); **<sup>13</sup>C-NMR (100 MHz, CDCl<sub>3</sub>):** δ 163.4, 156.6, 153.7, 145.4, 137.7, 135.4, 129.9 (q, *J* = 32 Hz), 127.9, 126.1 (q, *J* = 4 Hz), 125.9, 125.6, 124.1 (q, *J* = 272 Hz), 118.2, 117.8, 117.4, 113.7, 103.3, 50.4,

37.9; **HRMS (ESI+)**: Calcd. for  $C_{21}H_{14}F_3NO_2Na$  ( $[M+Na]^+$ ): 392.0874, Found: 392.0872; **Optical rotation**:  $[\alpha]_D^{23} +3.3$  ( $c$  1.0,  $CHCl_3$ ) for an enantiomerically enriched sample with 98:2 er. The enantiomeric ratio was determined by HPLC analysis using Daicel Chiralpak AS-H column (90:10 *n*-Hexane/EtOH, 1.0 mL/min, 20 °C, 320 nm,  $\tau_{minor} = 12.8$  min,  $\tau_{major} = 15.5$  min). See Supporting Information: Part B for HPLC chromatograms. The absolute stereochemistry of the product **3ae** was assigned in analogy with **3aa**.

**Compound 3af**: Purified by silica-gel flash column chromatography (12% EtOAc in petroleum ether); Off-white solid (49 mg, 0.141 mmol, 71% yield); **m.p.** 188-190 °C; **FT-IR (Thin film)**: 2925 (s), 2854 (s), 2229 (m), 1730 (s), 1600 (s), 1517 (s), 1344 (s), 1017 (m); **<sup>1</sup>H-NMR (400 MHz, CDCl<sub>3</sub>)**:  $\delta$  8.20 (d,  $J = 8.5$  Hz, 2H), 7.75-7.68 (m, 2H), 7.45-7.42 (m, 4H), 6.10 (ddd,  $J = 17.3, 10.0, 8.2$  Hz, 1H), 5.21 (d,  $J = 10.1$  Hz, 1H), 5.08 (d,  $J = 17.00$  Hz, 1H), 3.91-3.85 (m, 1H), 3.57 (dd,  $J = 13.0, 8.6$  Hz, 1H), 3.48 (dd,  $J = 13.0, 6.8$  Hz, 1H); **<sup>13</sup>C-NMR (100 MHz, CDCl<sub>3</sub>)**:  $\delta$  162.9, 156.4, 153.8, 148.6, 147.4, 137.1, 135.5, 128.5, 125.8, 125.7, 124.4, 118.4, 118.4, 117.3, 113.6, 103.5, 50.2, 37.7; **HRMS (ESI+)**: Calcd. for  $C_{20}H_{14}N_2O_4Na$  ( $[M+Na]^+$ ): 369.0851, Found: 369.0855; **Optical rotation**:  $[\alpha]_D^{24} -4.4$  ( $c$  1.0,  $CHCl_3$ ) for an enantiomerically enriched sample with 96:4 er. The enantiomeric ratio was determined by HPLC analysis using Daicel Chiralpak AS-H column (75:25 *n*-Hexane/EtOH, 1.0 mL/min, 20 °C, 300 nm,  $\tau_{minor} = 17.6$  min,  $\tau_{major} = 21.2$  min). See Supporting Information: Part B for HPLC chromatograms. The absolute stereochemistry of the product **3af** was assigned in analogy with **3aa**.

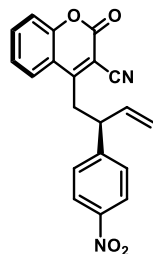

**Compound 3ag**: Purified by silica-gel flash column chromatography (8% EtOAc in petroleum ether); Off-white solid (53 mg, 0.158 mmol, 79% yield); **m.p.** 154-155 °C; **FT-IR (Thin film)**: 3080 (w), 2924 (m), 2362 (w), 2230 (m), 1734 (s), 1602 (s), 1556 (s), 1367 (m), 1084 (m); **<sup>1</sup>H-NMR (400 MHz, CDCl<sub>3</sub>)**:  $\delta$  7.73-7.67 (m, 2H), 7.43-7.39 (m, 2H), 7.29 (d,  $J = 8.3$  Hz, 2H), 7.17 (d,  $J = 8.4$  Hz, 2H), 6.08 (ddd,  $J = 17.2, 10.0, 8.1$  Hz, 1H), 5.13 (d,  $J = 10.2$  Hz, 1H), 5.01 (d,  $J = 16.9$  Hz, 1H), 3.76-3.70 (m, 1H), 3.50 (dd,  $J = 12.8, 8.4$  Hz, 1H), 3.43 (dd,  $J = 12.9, 6.9$  Hz, 1H); **<sup>13</sup>C-NMR (100 MHz, CDCl<sub>3</sub>)**:  $\delta$  163.6, 156.7, 153.7, 139.7, 138.2, 135.3, 133.4, 129.2, 128.8, 126.0, 125.6, 118.2, 117.4, 117.3, 113.7, 103.2, 49.9, 38.1; **HRMS (ESI+)**: Calcd. for  $C_{20}H_{14}ClNO_2Na$  ( $[M+Na]^+$ ): 358.0611, Found: 358.0614; **Optical rotation**:  $[\alpha]_D^{23} -5.9$  ( $c$  1.0,  $CHCl_3$ ) for an enantiomerically enriched sample with 97:3 er. The enantiomeric ratio was determined by HPLC analysis using Daicel Chiralpak IE column (90:10 *n*-Hexane/EtOH, 1.0 mL/min, 20 °C, 223 nm,  $\tau_{minor} = 32.8$  min,  $\tau_{major} = 34.7$  min). See Supporting Information: Part B for HPLC chromatograms. The absolute stereochemistry of the product **3ag** was assigned in analogy with **3aa**.

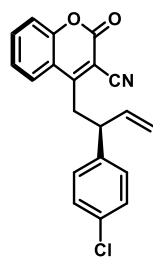

**Compound 3ah:** Purified by silica-gel flash column chromatography (10% EtOAc in petroleum

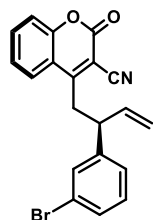

ether); Off-white solid (69 mg, 0.181 mmol, 91% yield); **m.p.** 94-96 °C; **FT-IR (Thin film):** 3079 (w), 2923 (w), 2361 (m), 2230 (m), 1733 (s), 1602 (s), 1557 (m), 1367 (m), 1077 (m); **<sup>1</sup>H-NMR (400 MHz, CDCl<sub>3</sub>):** δ 7.73-7.67 (m, 2H), 7.44-7.39 (m, 4H), 7.23-7.17 (m, 2H), 6.07 (ddd, *J* = 17.0, 10.0, 8.2 Hz, 1H), 5.14 (d, *J* = 10.1 Hz, 1H), 5.01 (d, *J* = 16.9 Hz, 1H), 3.73-3.67 (m, 1H), 3.53-3.48 (m, 1H), 3.44 (dd, *J* = 12.9, 6.8 Hz, 1H); **<sup>13</sup>C-NMR (100 MHz, CDCl<sub>3</sub>):** δ 163.5, 156.6, 153.7, 143.6, 137.8, 135.3, 130.8, 130.7, 130.5, 126.1, 125.9, 125.6, 123.1, 118.2, 117.6, 117.4, 113.7, 103.3, 50.2, 37.9; **HRMS (ESI<sup>+</sup>):** Calcd. for C<sub>20</sub>H<sub>14</sub>BrNO<sub>2</sub>Na ([M+Na]<sup>+</sup>): 402.0106, Found: 402.0107; **Optical rotation:** [α]<sub>D</sub><sup>23</sup> +1.1 (*c* 2.3, CHCl<sub>3</sub>) for an enantiomerically enriched sample with 98:2 er. The enantiomeric ratio was determined by HPLC analysis using Daicel Chiralpak IB column (90:10 *n*-Hexane/EtOH, 1.0 mL/min, 20 °C, 288 nm, τ<sub>major</sub> = 16.8 min, τ<sub>minor</sub> = 21.0 min). See Supporting Information: Part B for HPLC chromatograms. The absolute stereochemistry of the product **3ah** was assigned in analogy with **3aa**.

**Compound 3ai:** Purified by silica-gel flash column chromatography (8% EtOAc in petroleum

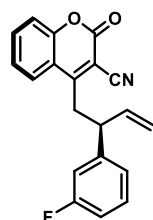

ether); Off-white solid (50 mg, 0.157 mmol, 78% yield); **m.p.** 138-140 °C; **FT-IR (Thin film):** 3080 (w), 2923 (m), 2230 (m), 1733 (s), 1602 (s), 1449 (m), 1078 (m); **<sup>1</sup>H-NMR (400 MHz, CDCl<sub>3</sub>):** δ 7.73-7.68 (m, 2H), 7.44-7.40 (m, 2H), 7.32-7.27 (m, 1H), 7.02 (d, *J* = 7.9 Hz, 1H), 6.97-6.93 (m, 2H), 6.14-6.05 (m, 1H), 5.14 (d, *J* = 10.2 Hz, 1H), 5.03 (d, *J* = 17.0 Hz, 1H), 3.77-3.71 (m, 1H), 3.51 (dd, *J* = 12.9, 8.5 Hz, 1H), 3.44 (dd, *J* = 12.9, 6.8 Hz, 1H); **<sup>13</sup>C-NMR (100 MHz, CDCl<sub>3</sub>):** δ 163.5, 163.0 (d, *J* = 247.0 Hz), 156.7, 153.7, 143.8 (d, *J* = 6.9 Hz), 137.9, 135.3, 130.7, 125.9, 125.6, 123.1 (d, *J* = 2.62 Hz), 118.2, 117.5, 114.6 (d, *J* = 9.8 Hz), 114.4 (d, *J* = 10.7 Hz), 113.6, 103.2, 50.2, 38.0; **HRMS (ESI<sup>+</sup>):** Calcd. for C<sub>20</sub>H<sub>14</sub>FNO<sub>2</sub>Na ([M+Na]<sup>+</sup>): 342.0906, Found: 342.0908; **Optical rotation:** [α]<sub>D</sub><sup>23</sup> +0.9 (*c* 1.0, CHCl<sub>3</sub>) for an enantiomerically enriched sample with 98:2 er. The enantiomeric ratio was determined by HPLC analysis using Daicel Chiralpak AS-H column (90:10 *n*-Hexane/EtOH, 1.0 mL/min, 20 °C, 304 nm, τ<sub>minor</sub> = 19.8 min, τ<sub>major</sub> = 21.5 min). See Supporting Information: Part B for HPLC chromatograms. The absolute stereochemistry of the product **3ai** was assigned in analogy with **3aa**.

**Compound 3aj:** Purified by silica-gel flash column chromatography (8% EtOAc

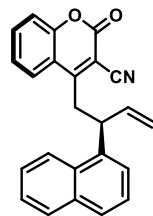

in petroleum ether); Off-white solid (44 mg, 0.125 mmol, 62% yield); **m.p.** 120-122 °C; **FT-IR (Thin film):** 3074 (w), 2926 (m), 2361 (m), 2230 (m), 1734 (s), 1602 (s), 1556 (m), 1079 (m); **<sup>1</sup>H-NMR (400 MHz, CDCl<sub>3</sub>):** δ 7.89 (d, *J* = 8.2 Hz, 1H), 7.84 (d, *J* = 8.2 Hz, 1H), 7.78 (d, *J* = 8.1 Hz, 1H), 7.69-7.65 (m, 2H), 7.60 (d, *J* = 7.2 Hz, 1H), 7.54-7.50 (m, 1H), 7.47-7.39 (m, 2H), 7.37-7.32 (m, 2H), 6.21 (ddd, *J* = 17.2, 10.1, 7.8 Hz, 1H), 5.18 (d, *J* = 10.2 Hz, 1H), 5.10 (d, *J* = 17.0 Hz, 1H), 4.61-4.55

(m, 1H), 3.76 (dd,  $J = 12.7, 8.8$  Hz, 1H), 3.56 (dd,  $J = 12.7, 6.2$  Hz, 1H);  **$^{13}\text{C-NMR}$  (100 MHz,  $\text{CDCl}_3$ ):**  $\delta$  164.0, 156.7, 153.6, 138.8, 137.5, 135.1, 134.0, 131.1, 129.3, 128.2, 126.4, 125.9, 125.8, 125.8, 125.5, 124.8, 122.5, 118.1, 117.7, 117.2, 113.8, 103.3, 45.1, 37.9; **HRMS (ESI+):** Calcd. for  $\text{C}_{24}\text{H}_{17}\text{NO}_2\text{Na}$  ( $[\text{M}+\text{Na}]^+$ ): 374.1157, Found: 374.1158; **Optical rotation:**  $[\alpha]_{\text{D}}^{21} +8.7$  ( $c$  1.0,  $\text{CHCl}_3$ ) for an enantiomerically enriched sample with 69:31 er. The enantiomeric ratio was determined by HPLC analysis using Daicel Chiralpak AS-H column (75:25 *n*-Hexane/EtOH, 1.0 mL/min, 20 °C, 280 nm,  $\tau_{\text{minor}} = 9.2$  min,  $\tau_{\text{major}} = 10.9$  min). See Supporting Information: Part B for HPLC chromatograms. The absolute stereochemistry of the product **3aj** was assigned in analogy with **3aa**.

**Compound 3ak:** Purified by silica-gel flash column chromatography (8% EtOAc in petroleum

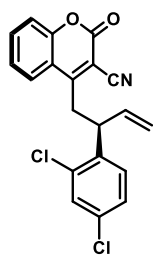

ether); Off-white solid (38 mg, 0.103 mmol, 51% yield); **m.p.** 138-140 °C; **FT-IR (Thin film):** 2925 (m), 2853 (m), 2231 (m), 1736 (s), 1602 (s), 1557 (m), 1079 (m);  **$^1\text{H-NMR}$  (400 MHz,  $\text{CDCl}_3$ ):**  $\delta$  7.82-7.80 (m, 1H), 7.74-7.69 (m, 1H), 7.45-7.40 (m, 3H), 7.35-7.31 (m, 2H), 6.09 (ddd,  $J = 17.0, 10.2, 8.0$  Hz, 1H), 5.18 (d,  $J = 10.1$  Hz, 1H), 5.05 (d,  $J = 16.9$  Hz, 1H), 4.33-4.28 (m, 1H), 3.50 (dd,  $J = 12.5, 8.9$  Hz, 1H), 3.41 (dd,  $J = 12.9, 6.9$  Hz, 1H);  **$^{13}\text{C-NMR}$  (100 MHz,  $\text{CDCl}_3$ ):**  $\delta$  162.9, 156.6, 153.7, 137.6, 136.7, 135.3, 133.9, 133.8, 129.8, 129.7, 128.2, 125.9, 125.6, 118.2, 118.1, 117.5, 113.7, 103.4, 45.5, 37.6; **HRMS (ESI+):** Calcd. for  $\text{C}_{20}\text{H}_{13}\text{Cl}_2\text{NO}_2\text{Na}$  ( $[\text{M}+\text{Na}]^+$ ): 392.0221, Found: 392.0220; **Optical rotation:**  $[\alpha]_{\text{D}}^{23} -3.2$  ( $c$  1.0,  $\text{CHCl}_3$ ) for an enantiomerically enriched sample with 71:29 er. The enantiomeric ratio was determined by HPLC analysis using Daicel Chiralpak AS-H column (90:10 *n*-Hexane/EtOH, 1.0 mL/min, 20 °C, 300 nm,  $\tau_{\text{minor}} = 13.6$  min,  $\tau_{\text{major}} = 14.7$  min). See Supporting Information: Part B for HPLC chromatograms. The absolute stereochemistry of the product **3ak** was assigned in analogy with **3aa**.

**Compound 3al:** Purified by silica-gel flash column chromatography (8% EtOAc in petroleum

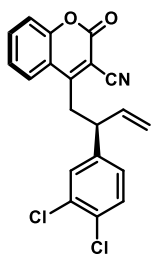

ether); Off-white solid (55 mg, 0.149 mmol, 75% yield); **m.p.** 95-97 °C; **FT-IR (Thin film):** 2923 (m), 2854 (m), 2230 (m), 1733 (s), 1602 (s), 1556 (m), 1031 (m);  **$^1\text{H-NMR}$  (400 MHz,  $\text{CDCl}_3$ ):**  $\delta$  7.74-7.68 (m, 2H), 7.45-7.34 (m, 4H), 7.12-7.10 (m, 1H), 6.08-5.99 (m, 1H), 5.15 (d,  $J = 10.1$  Hz, 1H), 5.01 (d,  $J = 16.9$  Hz, 1H), 3.72-3.70 (m, 1H), 3.49-3.47 (m, 1H), 3.46-3.44 (m, 1H);  **$^{13}\text{C-NMR}$  (100 MHz,  $\text{CDCl}_3$ ):**  $\delta$  163.2, 156.6, 153.7, 141.5, 137.5, 135.5, 133.1, 131.7, 131.0, 129.5, 126.8, 125.9, 125.7, 118.3, 117.9, 117.3, 113.7, 103.3, 49.6, 37.7; **HRMS (ESI+):** Calcd. for  $\text{C}_{20}\text{H}_{13}\text{Cl}_2\text{NO}_2\text{Na}$  ( $[\text{M}+\text{Na}]^+$ ): 392.0221, Found: 392.0221; **Optical rotation:**  $[\alpha]_{\text{D}}^{20} -2.1$  ( $c$  2.0,  $\text{CHCl}_3$ ) for an enantiomerically enriched sample with 98:2 er. The enantiomeric ratio was determined by HPLC analysis using Daicel Chiralpak IG column (90:10 *n*-Hexane/EtOH, 1.0 mL/min, 20 °C, 211 nm,  $\tau_{\text{minor}} = 26.4$  min,  $\tau_{\text{major}} = 32.3$  min). See Supporting Information: Part B for HPLC chromatograms. The absolute stereochemistry of the product **3al** was assigned in analogy with **3aa**.

**Compound 3am:** Purified by silica-gel flash column chromatography (8% EtOAc in petroleum ether); Light yellow solid (62 mg, 0.180 mmol, 90% yield); **m.p.** 145-147 °C; **FT-IR (Thin film):** 2922 (m), 2361 (m), 2230 (m), 1733 (s), 1603 (s), 1492 (s), 1245 (m), 1038 (m); **<sup>1</sup>H-NMR (400 MHz, CDCl<sub>3</sub>):** δ 7.72-7.68 (m, 2H), 7.43-7.38 (m, 2H), 6.73-6.71 (m, 2H), 6.64-6.62 (m, 1H), 6.08 (ddd, *J* = 17.3, 10.2, 8.0 Hz, 1H), 5.93 (s, 2H), 5.11 (d, *J* = 10.1 Hz, 1H), 5.01 (d, *J* = 17.0 Hz, 1H), 3.68-3.63 (m, 1H), 3.48 (dd, *J* = 12.8, 8.1 Hz, 1H), 3.40 (dd, *J* = 12.9, 7.1 Hz, 1H); **<sup>13</sup>C-NMR (100 MHz, CDCl<sub>3</sub>):** δ 163.9, 156.8, 153.7, 148.2, 147.0, 138.8, 135.2, 135.0, 126.0, 125.5, 120.6, 118.1, 117.5, 116.6, 113.7, 108.6, 107.8, 103.1, 101.3, 50.2, 38.4; **HRMS (ESI+):** Calcd. for C<sub>21</sub>H<sub>15</sub>NO<sub>4</sub>Na ([M+Na]<sup>+</sup>): 368.0899, Found: 368.0907; **Optical rotation:** [α]<sub>D</sub><sup>22</sup> -39.7 (c 2.0, CHCl<sub>3</sub>) for an enantiomerically enriched sample with 98:2 er. The enantiomeric ratio was determined by HPLC analysis using Daicel Chiralpak AS-H column (90:10 *n*-Hexane/EtOH, 1.0 mL/min, 20 °C, 286 nm, τ<sub>minor</sub> = 37.3 min, τ<sub>major</sub> = 48.5 min). See Supporting Information: Part B for HPLC chromatograms. The absolute stereochemistry of the product **3am** was assigned in analogy with **3aa**.

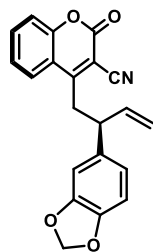

**Compound 3an:** Purified by silica-gel flash column chromatography (10% EtOAc in dichloromethane); Yellow thick oil (52 mg, 0.171 mmol, 86% yield); **FT-IR (Thin film):**, 2924 (m), 2853 (m), 2228 (m), 1733 (s), 1601 (s), 1556 (m), 1368 (m), 1082 (m); **<sup>1</sup>H-NMR (400 MHz, CDCl<sub>3</sub>):** δ 8.51-8.42 (m, 2H), 7.72-7.66 (m, 3H), 7.44-7.38 (m, 2H), 7.30-7.26 (m, 1H), 6.14-6.05 (m, 1H), 5.17 (d, *J* = 10.0 Hz, 1H), 5.06 (d, *J* = 16.9 Hz, 1H), 3.81-3.75 (m, 1H), 3.57-3.52 (m, 1H), 3.48-3.43 (m, 1H); **<sup>13</sup>C-NMR (100 MHz, CDCl<sub>3</sub>):** δ 163.1, 156.5, 153.7, 149.1, 148.9, 137.5, 136.7, 135.4, 134.9, 125.9, 125.7, 124.0, 118.2, 117.9, 117.3, 113.6, 103.3, 47.8, 37.8; **HRMS (ESI+):** Calcd. for C<sub>19</sub>H<sub>14</sub>N<sub>2</sub>O<sub>2</sub>Na ([M+Na]<sup>+</sup>): 325.0953, Found: 325.0954; **Optical rotation:** [α]<sub>D</sub><sup>21</sup> +3.7 (c 1.0, CHCl<sub>3</sub>) for an enantiomerically enriched sample with 97.5:2.5 er. The enantiomeric ratio was determined by HPLC analysis using Daicel Chiralpak AS-H column (75:25 *n*-Hexane/EtOH, 1.0 mL/min, 20 °C, 333 nm, τ<sub>minor</sub> = 13.4 min, τ<sub>major</sub> = 24.7 min). See Supporting Information: Part B for HPLC chromatograms. The absolute stereochemistry of the product **3an** was assigned in analogy with **3aa**.

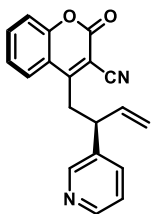

**Compound 3ao:** Purified by silica-gel flash column chromatography (9% EtOAc in petroleum ether); Off-white solid (43 mg, 0.148 mmol, 74% yield); **m.p.** 132-134 °C; **FT-IR (Thin film):** 3080 (w), 2924 (w), 2230 (m), 1734 (s), 1602 (s), 1556 (s), 1078 (m); **<sup>1</sup>H-NMR (400 MHz, CDCl<sub>3</sub>):** δ 7.74-7.67 (m, 2H), 7.42-7.35 (m, 3H), 6.29-6.27 (m, 1H), 6.10-6.02 (m, 2H), 5.19 (d, *J* = 10.1 Hz, 1H), 5.07 (d, *J* = 17.0 Hz, 1H), 3.86-3.81 (m, 1H), 3.63 (dd, *J* = 13.0, 6.7 Hz, 1H), 3.38 (dd, *J* = 12.9, 8.3 Hz, 1H); **<sup>13</sup>C-NMR (100 MHz, CDCl<sub>3</sub>):** δ 163.3, 156.7, 153.5, 142.1, 135.5, 135.1, 125.9, 125.5, 118.3, 117.9, 117.3, 113.4, 110.5, 106.5, 103.1, 44.1, 36.2; **HRMS (ESI+):** Calcd. for C<sub>18</sub>H<sub>13</sub>NO<sub>3</sub>Na

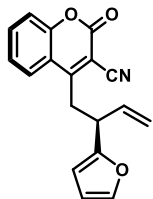

([M+Na]<sup>+</sup>): 314.0793, Found: 314.0796; **Optical rotation:**  $[\alpha]_D^{21} -10.0$  (*c* 1.0, CHCl<sub>3</sub>) for an enantiomerically enriched sample with 97:3 er. The enantiomeric ratio was determined by HPLC analysis using Daicel Chiralpak IA column (90:10 *n*-Hexane/*i*-PrOH, 1.0 mL/min, 20 °C, 227 nm,  $\tau_{\text{minor}} = 14.5$  min,  $\tau_{\text{major}} = 15.9$  min). See Supporting Information: Part B for HPLC chromatograms. The absolute stereochemistry of the product **3ao** was assigned in analogy with **3aa**.

**Compound 3ap:** Purified by silica-gel flash column chromatography (10% EtOAc in petroleum

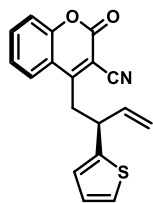

ether); Light yellow solid (53 mg, 0.172 mmol, 86% yield); **m.p.** 140-142 °C; **FT-IR (Thin film):** 2923 (w), 2229 (m), 1733 (s), 1601 (s), 1555 (m), 1366 (m); **<sup>1</sup>H-NMR (400 MHz, CDCl<sub>3</sub>):**  $\delta$  7.73-7.68 (m, 2H), 7.43-7.39 (m, 2H), 7.21 (dd, *J* = 5.1 Hz, 1.2 Hz, 1H), 6.96-6.94 (m, 1H), 6.90-6.89 (m, 1H), 6.09 (ddd, *J* = 16.9, 10.0, 8.4 Hz, 1H), 5.15 (d, *J* = 10.1 Hz, 1H), 5.04 (d, *J* = 16.9 Hz, 1H), 4.06-4.00 (m, 1H), 3.57 (dd, *J* = 12.9, 6.3 Hz, 1H), 3.50 (dd, *J* = 12.9, 8.8 Hz, 1H); **<sup>13</sup>C-NMR (100 MHz, CDCl<sub>3</sub>):**  $\delta$  163.2, 156.7, 153.7, 144.5, 138.0, 135.3, 127.3, 125.9, 125.6, 124.6, 124.5, 118.1, 117.5, 117.5, 113.6, 103.3, 45.8, 38.9; **HRMS (ESI<sup>+</sup>):** Calcd. for C<sub>18</sub>H<sub>13</sub>NO<sub>2</sub>SNa ([M+Na]<sup>+</sup>): 330.0565, Found: 330.0566; **Optical rotation:**  $[\alpha]_D^{23} -15.2$  (*c* 2.0, CHCl<sub>3</sub>) for an enantiomerically enriched sample with 99:1 er. The enantiomeric ratio was determined by HPLC analysis using Daicel Chiralpak IE column (90:10 *n*-Hexane/EtOH, 1.0 mL/min, 20 °C, 322 nm,  $\tau_{\text{minor}} = 36.8$  min,  $\tau_{\text{major}} = 41.5$  min). See Supporting Information: Part B for HPLC chromatograms. The absolute stereochemistry of the product **3ap** was assigned in analogy with **3aa**.

**Compound 3aq:** Purified by silica-gel flash column chromatography (7% EtOAc in petroleum

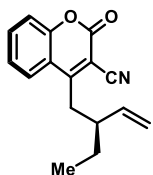

ether); Off-white solid (24 mg, 0.094 mmol, 48% yield); **m.p.** 85-87 °C; **FT-IR (Thin film):** 2964 (m), 2921 (m), 2851 (m), 2229 (m), 1728 (s), 1599 (s), 1553 (s), 1367 (m), 1078 (m); **<sup>1</sup>H-NMR (400 MHz, CDCl<sub>3</sub>):**  $\delta$  7.72-7.67 (m, 2H), 7.44-7.38 (m, 2H), 5.69-5.60 (m, 1H), 5.00 (d, *J* = 9.9 Hz, 1H), 4.80 (d, *J* = 16.9 Hz, 1H), 3.22-3.18 (m, 1H), 3.07-3.02 (m, 1H), 2.38-2.36 (m, 1H), 1.66-1.62 (m, 1H), 1.59-1.55 (m, 1H), 0.98-0.94 (m, 3H); **<sup>13</sup>C-NMR (100 MHz, CDCl<sub>3</sub>):**  $\delta$  164.9, 156.9, 153.7, 139.3, 135.1, 126.2, 125.5, 118.1, 117.8, 117.4, 113.9, 102.9, 47.7, 37.5, 28.4, 11.9; **HRMS (ESI<sup>+</sup>):** Calcd. for C<sub>16</sub>H<sub>15</sub>NO<sub>2</sub>Na ([M+Na]<sup>+</sup>): 276.1000, Found: 276.1003; **Optical rotation:**  $[\alpha]_D^{20} -2.4$  (*c* 1.0, CHCl<sub>3</sub>) for an enantiomerically enriched sample with 95:5 er. The enantiomeric ratio was determined by HPLC analysis using Phenomenex Cellulose-1 column (95:5 *n*-Hexane/*i*-PrOH, 1.0 mL/min, 20 °C, 328 nm,  $\tau_{\text{minor}} = 16.0$  min,  $\tau_{\text{major}} = 17.3$  min). See Supporting Information: Part B for HPLC chromatograms. The absolute stereochemistry of the product **3aq** was assigned in analogy with **3aa**.

**Compound 3ar:** Purified by silica-gel flash column chromatography (8% EtOAc in petroleum

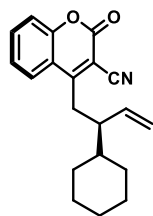

ether); Off-white solid (34 mg, 0.111 mmol, 55% yield); **m.p.** 150-152 °C; **FT-IR**

(**Thin film**): 2925 (s), 2851 (m), 2229 (m), 1736 (s), 1602 (s), 1556 (m), 1077 (m);

**<sup>1</sup>H-NMR (400 MHz, CDCl<sub>3</sub>):** δ 7.70-7.66 (m, 2H), 7.42-7.37 (m, 2H), 5.74-5.64

(m, 1H), 4.93 (d, *J* = 10.1 Hz, 1H), 4.62 (d, *J* = 16.9 Hz, 1H), 3.31 (dd, *J* = 12.8,

4.0 Hz, 1H), 3.00 (dd, *J* = 12.4, 11.0 Hz, 1H), 2.30-2.22 (m, 1H), 1.83-1.79 (m,

4H), 1.71-1.68 (m, 1H), 1.54-1.46 (m, 1H), 1.36-0.99 (m, 5H); **<sup>13</sup>C-NMR (100 MHz, CDCl<sub>3</sub>):** δ

165.8, 157.0, 153.7, 137.6, 135.0, 126.1, 125.4, 118.1, 117.9, 117.8, 114.0, 103.0, 52.1, 42.6,

34.9, 31.2, 30.2, 26.5, 26.5, 26.4; **HRMS (ESI<sup>+</sup>):** Calcd. for C<sub>20</sub>H<sub>21</sub>NO<sub>2</sub>Na ([M+Na]<sup>+</sup>):

330.1470, Found: 330.1469; **Optical rotation:** [α]<sub>D</sub><sup>20</sup> -5.1 (*c* 1.0, CHCl<sub>3</sub>) for an enantiomerically

enriched sample with 93.5:6.5 er. The enantiomeric ratio was determined by HPLC analysis

using Daicel Chiralpak IB column (90:10 *n*-Hexane/EtOH, 1.0 mL/min, 20 °C, 341 nm, τ<sub>minor</sub> =

11.8 min, τ<sub>major</sub> = 12.3 min). See Supporting Information: Part B for HPLC chromatograms. The

absolute stereochemistry of the product **3ar** was assigned in analogy with **3aa**.

**Compound 3as:** Purified by silica-gel flash column chromatography (6% EtOAc in petroleum

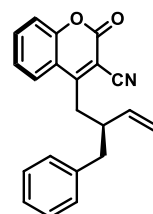

ether); White solid (25 mg, 0.079 mmol, 40% yield); **m.p.** 111-113 °C; **FT-IR**

(**Thin film**): 3072 (w), 2923 (m), 2853 (w), 2229 (m), 1734 (s), 1602 (m), 1555

(m), 1450 (m), 1077 (m); **<sup>1</sup>H-NMR (400 MHz, CDCl<sub>3</sub>):** δ 7.65-7.61 (m, 1H),

7.38-7.34 (m, 3H), 7.30-7.24 (m, 4H), 7.17-7.15 (m, 1H), 5.85-5.76 (m, 1H), 5.01

(d, *J* = 10.1 Hz, 1H), 4.77 (d, *J* = 17.0 Hz, 1H), 3.19-3.15 (m, 1H), 3.03-2.96 (m,

2H), 2.82-2.76 (m, 1H), 2.75-2.69 (m, 1H); **<sup>13</sup>C-NMR (100 MHz, CDCl<sub>3</sub>):** δ 164.6, 156.8,

153.7, 139.0, 138.9, 135.0, 129.4, 128.8, 127.0, 125.9, 125.4, 118.0, 117.6, 117.5, 114.0, 103.1,

48.0, 42.3, 36.5; **HRMS (ESI<sup>+</sup>):** Calcd. for C<sub>21</sub>H<sub>17</sub>NO<sub>2</sub>Na ([M+Na]<sup>+</sup>): 338.1157, Found:

338.1154; **Optical rotation:** [α]<sub>D</sub><sup>21</sup> +8.1 (*c* 1.0, CHCl<sub>3</sub>) for an enantiomerically enriched

sample with 95:5 er. The enantiomeric ratio was determined by HPLC analysis using Daicel Chiralpak

IG column (95:5 *n*-Hexane/EtOH, 1.0 mL/min, 20 °C, 294 nm, τ<sub>minor</sub> = 34.0 min, τ<sub>major</sub> = 37.1

min). See Supporting Information: Part B for HPLC chromatograms. The absolute

stereochemistry of the product **3as** was assigned in analogy with **3aa**.

**Compound 3at:** Regioselectivity (rr) > 20:1 was determined by <sup>1</sup>H NMR analysis of the crude

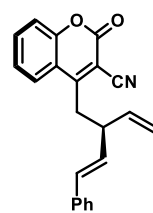

reaction mixture. Purified by silica-gel flash column chromatography (8% EtOAc

in petroleum ether); Off-white solid (50 mg, 0.176 mmol, 79% yield); **m.p.** 137-

139 °C; **FT-IR (Thin film):** 3081 (w), 2925 (m), 2860 (w), 2361 (m), 2230 (m),

1733 (s), 1602 (s), 1556 (m), 1078 (w); **<sup>1</sup>H-NMR (400 MHz, CDCl<sub>3</sub>):** δ 7.77 (d, *J*

= 7.8 Hz, 1H), 7.73-7.69 (m, 1H), 7.46-7.40 (m, 2H), 7.31-7.23 (m, 5H), 6.35 (d, *J*

= 15.8 Hz, 1H), 6.22 (dd, *J* = 15.6, 6.7 Hz, 1H), 6.00-5.92 (m, 1H), 5.14 (d, *J* = 10.0 Hz, 1H),

5.07 (d, *J* = 17.0 Hz, 1H), 3.39-3.34 (m, 3H); **<sup>13</sup>C-NMR (100 MHz, CDCl<sub>3</sub>):** δ 163.8, 156.8,

153.7, 138.1, 136.4, 135.2, 131.8, 129.3, 128.7, 127.9, 126.4, 126.1, 125.6, 118.1, 117.6, 116.9,



113.9, 103.1, 48.5, 37.3; **HRMS (ESI+)**: Calcd. for C<sub>22</sub>H<sub>17</sub>NO<sub>2</sub>Na ([M+Na]<sup>+</sup>): 350.1157, Found: 350.1159; **Optical rotation**: [α]<sub>D</sub><sup>24</sup> –86.8 (*c* 1.0, CHCl<sub>3</sub>) for an enantiomerically enriched sample with 97:3 er. The enantiomeric ratio was determined by HPLC analysis using Daicel Chiralpak IA column (90:10 *n*-Hexane/EtOH, 1.0 mL/min, 20 °C, 254 nm, τ<sub>minor</sub> = 16.8 min, τ<sub>major</sub> = 18.2 min). See Supporting Information: Part B for HPLC chromatograms. The absolute stereochemistry of the product **3at** was assigned in analogy with **3aa**.

**Compound 3au**: Regioselectivity (rr) > 20:1 was determined by <sup>1</sup>H NMR analysis of the crude

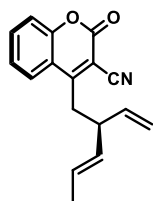

reaction mixture. Purified by silica-gel flash column chromatography (6% EtOAc in petroleum ether); Off-white solid (44 mg, 0.166 mmol, 83% yield); **m.p.** 105-107 °C; **FT-IR (Thin film)**: 2923 (m), 2855 (w), 2228 (m), 1727 (s), 1600 (s), 1556 (m), 1449 (m), 1367 (m), 1078 (m); **<sup>1</sup>H-NMR (400 MHz, CDCl<sub>3</sub>)**: δ 7.72-7.68 (m, 2H), 7.44-7.38 (m, 2H), 5.85 (ddd, *J* = 17.2, 9.9, 7.6 Hz, 1H), 5.51-5.38 (m, 2H), 5.05 (d, *J* = 10.2 Hz, 1H), 4.97 (d, *J* = 17.0 Hz, 1H), 3.20-3.17 (m, 2H), 3.14-3.09 (m, 1H), 1.64 (d, *J* = 5.6 Hz, 3H); **<sup>13</sup>C-NMR (100 MHz, CDCl<sub>3</sub>)**: δ 164.2, 156.9, 153.7, 138.8, 135.1, 130.9, 127.8, 126.2, 125.5, 118.1, 117.6, 116.2, 113.8, 103.0, 48.3, 37.5, 17.9; **HRMS (ESI+)**: Calcd. for C<sub>17</sub>H<sub>15</sub>NO<sub>2</sub>Na ([M+Na]<sup>+</sup>): 288.1000, Found: 288.1004; **Optical rotation**: [α]<sub>D</sub><sup>21</sup> –17.0 (*c* 1.0, CHCl<sub>3</sub>) for an enantiomerically enriched sample with 95:5 er. The enantiomeric ratio was determined by HPLC analysis using Phenomenex Cellulose-1 column (99:1 *n*-Hexane/EtOH, 1.0 mL/min, 20 °C, 322 nm, τ<sub>major</sub> = 24.0 min, τ<sub>minor</sub> = 29.0 min). See Supporting Information: Part B for HPLC chromatograms. The absolute stereochemistry of the product **3au** was assigned in analogy with **3aa**.

**Compound 3ba**: Purified by silica-gel flash column chromatography (7% EtOAc in petroleum

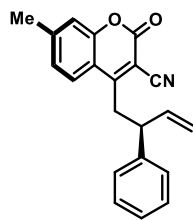

ether); Off-white solid (62 mg, 0.196 mmol, 98% yield); **m.p.** 114-116 °C; **FT-IR (Thin film)**: 3029 (w), 2923 (m), 2362 (m), 2227 (m), 1731 (s), 1620 (s), 1545 (m), 1086 (m); **<sup>1</sup>H-NMR (400 MHz, CDCl<sub>3</sub>)**: δ 7.58 (d, *J* = 8.2 Hz, 1H), 7.34-7.30 (m, 2H), 7.26-7.18 (m, 5H), 6.12 (ddd, *J* = 18.0, 9.9, 8.3 Hz, 1H), 5.10 (d, *J* = 10.2 Hz, 1H), 5.00 (d, *J* = 16.9 Hz, 1H), 3.75-3.70 (m, 1H), 3.49 (dd, *J* = 12.9, 8.7 Hz, 1H), 3.42 (dd, *J* = 12.9, 6.9 Hz, 1H), 2.50 (s, 3H); **<sup>13</sup>C-NMR (100 MHz, CDCl<sub>3</sub>)**: δ 164.0, 157.1, 153.7, 147.3, 141.3, 138.7, 129.0, 127.5, 127.3, 126.8, 125.8, 118.0, 116.7, 115.2, 113.9, 101.7, 50.6, 38.2, 22.0; **HRMS (ESI+)**: Calcd. for C<sub>21</sub>H<sub>17</sub>NO<sub>2</sub>Na ([M+Na]<sup>+</sup>): 338.1157, Found: 338.1180; **Optical rotation**: [α]<sub>D</sub><sup>24</sup> –6.4 (*c* 2.0, CHCl<sub>3</sub>) for an enantiomerically enriched sample with 98:2 er. The enantiomeric ratio was determined by HPLC analysis using Daicel Chiralpak IA column (90:10 *n*-Hexane/EtOH, 1.0 mL/min, 20 °C, 320 nm, τ<sub>minor</sub> = 15.0 min, τ<sub>major</sub> = 16.0 min). See Supporting Information: Part B for HPLC chromatograms. The absolute stereochemistry of the product **3ba** was assigned in analogy with **3aa**.

**Compound 3ca:** Purified by silica-gel flash column chromatography (7% EtOAc in petroleum

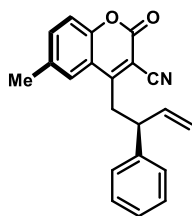

ether); Off-white solid (62 mg, 0.196 mmol, 98% yield); **m.p.** 133-135 °C; **FT-IR (Thin film):** 3027 (m), 2925 (m), 2229 (m), 1732 (s), 1561 (s), 1493 (m), 1368 (m), 1081 (m); **<sup>1</sup>H-NMR (400 MHz, CDCl<sub>3</sub>):** δ 7.47 (d, *J* = 8.2 Hz, 1H), 7.38 (s, 1H), 7.32-7.20 (m, 6H), 6.13 (ddd, *J* = 17.2, 10.0, 8.3 Hz, 1H), 5.11 (d, *J* = 10.1 Hz, 1H), 5.02 (d, *J* = 16.9 Hz, 1H), 3.74-3.69 (m, 1H), 3.49 (dd, *J* =

12.6, 8.2 Hz, 1H), 3.41 (dd, *J* = 12.8, 7.0 Hz, 1H), 2.42 (s, 3H); **<sup>13</sup>C-NMR (100 MHz, CDCl<sub>3</sub>):** δ 164.0, 157.0, 151.8, 141.3, 138.7, 136.3, 135.4, 129.0, 127.5, 127.4, 125.7, 117.7, 117.2, 116.7, 113.8, 102.8, 50.5, 38.2, 21.1; **HRMS (ESI<sup>+</sup>):** Calcd. for C<sub>21</sub>H<sub>17</sub>NO<sub>2</sub>Na ([M+Na]<sup>+</sup>): 338.1157, Found: 338.1154; **Optical rotation:** [α]<sub>D</sub><sup>23</sup> -7.5 (*c* 2.0, CHCl<sub>3</sub>) for an enantiomerically enriched sample with 98:2 er. The enantiomeric ratio was determined by HPLC analysis using Daicel Chiralpak IB column (90:10 *n*-Hexane/EtOH, 1.0 mL/min, 20 °C, 308 nm, τ<sub>major</sub> = 11.9 min, τ<sub>minor</sub> = 14.0 min). See Supporting Information: Part B for HPLC chromatograms. The absolute stereochemistry of the product **3ca** was assigned in analogy with **3aa**.

**Compound 3da:** Purified by silica-gel flash column chromatography (12% EtOAc in petroleum

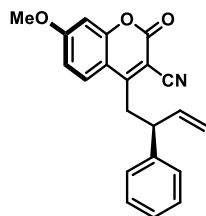

ether); Off-white solid (53 mg, 0.160 mmol, 80% yield); **m.p.** 102-104 °C; **FT-IR (Thin film):** 2926 (w), 2226 (m), 1729 (s), 1617 (s), 1381 (m), 1244 (m); **<sup>1</sup>H-NMR (400 MHz, CDCl<sub>3</sub>):** δ 7.56 (d, *J* = 9.0 Hz, 1H), 7.34-7.30 (m, 2H), 7.26-7.22 (m, 3H), 6.92 (dd, *J* = 9.0, 2.5 Hz, 1H), 6.82 (d, *J* = 2.5 Hz, 1H), 6.12 (ddd, *J* = 17.1, 10.1, 8.3 Hz, 1H), 5.11 (d, *J* = 10.2 Hz, 1H), 5.01 (d, *J* = 16.9 Hz, 1H), 3.92 (s, 3H), 3.74-3.68 (m, 1H), 3.47 (dd, *J* = 12.8, 8.5 Hz, 1H), 3.38 (dd, *J* =

12.8, 6.9 Hz, 1H); **<sup>13</sup>C-NMR (100 MHz, CDCl<sub>3</sub>):** δ 165.4, 163.9, 157.5, 156.0, 141.4, 138.7, 129.1, 127.6, 127.4, 127.3, 116.8, 114.2, 111.3, 101.4, 99.2, 56.3, 50.7, 38.3; **HRMS (ESI<sup>+</sup>):** Calcd. for C<sub>21</sub>H<sub>17</sub>NO<sub>3</sub>Na ([M+Na]<sup>+</sup>): 354.1106, Found: 354.1107; **Optical rotation:** [α]<sub>D</sub><sup>21</sup> +4.8 (*c* 2.0, CHCl<sub>3</sub>) for an enantiomerically enriched sample with 97.5:2.5 er. The enantiomeric ratio was determined by HPLC analysis using Daicel Chiralpak AS-H column (90:10 *n*-Hexane/EtOH, 1.0 mL/min, 20 °C, 246 nm, τ<sub>minor</sub> = 8.8 min, τ<sub>major</sub> = 9.8 min). See Supporting Information: Part B for HPLC chromatograms. The absolute stereochemistry of the product **3da** was assigned in analogy with **3aa**.

**Compound 3ea:** Purified by silica-gel flash column chromatography (12% EtOAc in petroleum

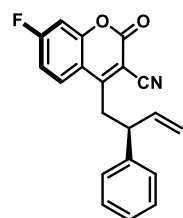

ether); Off-white solid (53 mg, 0.166 mmol, 83% yield); **m.p.** 110-112 °C; **FT-IR (Thin film):** 3083 (w), 2923 (w), 2362 (m), 2230 (m), 1739 (s), 1611 (s), 1371 (m), 1025 (m); **<sup>1</sup>H-NMR (400 MHz, CDCl<sub>3</sub>):** δ 7.70-7.66 (m, 1H), 7.34-7.30 (m, 2H), 7.26-7.21 (m, 3H), 7.15-7.08 (m, 2H), 6.13 (ddd, *J* = 17.1, 10.1, 8.0 Hz, 1H), 5.13 (d, *J* = 10.2 Hz, 1H), 5.07 (d, *J* = 17.0 Hz, 1H), 3.74-3.68 (m, 1H), 3.51 (dd, *J* = 12.8, 8.3 Hz, 1H), 3.42 (dd, *J* = 12.9, 7.0 Hz, 1H); **<sup>13</sup>C-NMR (100 MHz, CDCl<sub>3</sub>):** δ 166.2 (d, *J* = 261.0 Hz), 163.6, 156.5, 155.1 (d, *J* = 13.4 Hz), 141.1, 138.5, 129.1,

128.3 (d,  $J = 10.8$  Hz), 127.7, 127.4, 116.9, 114.4 (d,  $J = 2.6$  Hz), 113.9 (d,  $J = 22.9$  Hz), 113.5, 105.5 (d,  $J = 25.6$  Hz), 101.9 (d,  $J = 2.6$  Hz), 50.6, 38.4; **HRMS (ESI+)**: Calcd. for  $C_{20}H_{14}FNO_2Na$  ( $[M+Na]^+$ ): 342.0906, Found: 342.0907; **Optical rotation**:  $[\alpha]_D^{21} -16.1$  ( $c$  2.0,  $CHCl_3$ ) for an enantiomerically enriched sample with 98:2 er. The enantiomeric ratio was determined by HPLC analysis using Daicel Chiralpak IA column (90:10 *n*-Hexane/EtOH, 1.0 mL/min, 20 °C, 215 nm,  $\tau_{minor} = 14.7$  min,  $\tau_{major} = 17.6$  min). See Supporting Information: Part B for HPLC chromatograms. The absolute stereochemistry of the product **3ea** was assigned in analogy with **3aa**.

**Compound 3fa**: Purified by silica-gel flash column chromatography (6% EtOAc in petroleum

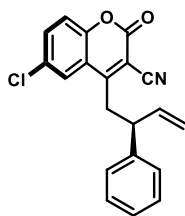

ether); Off-white solid (66 mg, 0.196 mmol, 98% yield); **m.p.** 124-126 °C; **FT-IR (Thin film)**: 3077 (w), 2924 (w), 2231 (w), 1739 (s), 1602 (m), 1553 (s), 1077 (m); **<sup>1</sup>H-NMR (400 MHz, CDCl<sub>3</sub>)**:  $\delta$  7.60 (dd,  $J = 8.8, 2.1$  Hz, 1H), 7.55 (d,  $J = 2.0$  Hz, 1H), 7.33-7.29 (m, 3H), 7.24-7.19 (m, 3H), 6.13 (ddd,  $J = 17.5, 10.0, 8.2$  Hz, 1H), 5.16 (d,  $J = 10.2$  Hz, 1H), 5.07 (d,  $J = 17.0$  Hz, 1H), 3.74-

3.68 (m, 1H), 3.49 (dd,  $J = 12.9, 8.2$  Hz, 1H), 3.38 (dd,  $J = 12.9, 7.2$  Hz, 1H); **<sup>13</sup>C-NMR (100 MHz, CDCl<sub>3</sub>)**:  $\delta$  163.0, 156.1, 151.9, 140.9, 138.5, 134.9, 131.0, 129.1, 127.7, 127.4, 125.5, 119.4, 118.6, 116.9, 113.3, 104.0, 50.4, 38.3; **HRMS (ESI+)**: Calcd. for  $C_{20}H_{14}ClNO_2Na$  ( $[M+Na]^+$ ): 358.0611, Found: 358.0607; **Optical rotation**:  $[\alpha]_D^{21} -11.3$  ( $c$  2.0,  $CHCl_3$ ) for an enantiomerically enriched sample with 97:3 er. The enantiomeric ratio was determined by HPLC analysis using Daicel Chiralpak AS-H column (90:10 *n*-Hexane/EtOH, 1.0 mL/min, 20 °C, 286 nm,  $\tau_{minor} = 18.7$  min,  $\tau_{major} = 20.3$  min). See Supporting Information: Part B for HPLC chromatograms. The absolute stereochemistry of the product **3fa** was assigned in analogy with **3aa**.

**Compound 3ga**: Purified by silica-gel flash column chromatography (6% EtOAc in petroleum

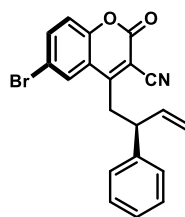

ether); Off-white solid (67 mg, 0.176 mmol, 88% yield); **m.p.** 128-130 °C; **FT-IR (Thin film)**: 3076 (w), 2924 (m), 2230 (m), 1738 (s), 1598 (m), 1549 (m), 1275 (m), 1079 (m); **<sup>1</sup>H-NMR (400 MHz, CDCl<sub>3</sub>)**:  $\delta$  7.74 (d,  $J = 8.6$  Hz, 1H), 7.70 (s, 1H), 7.33-7.26 (m, 4H), 7.23-7.21 (m, 2H), 6.20-6.11 (m, 1H), 5.17 (d,  $J = 10.2$  Hz, 1H), 5.08 (d,  $J = 16.9$  Hz, 1H), 3.74-3.68 (m, 1H), 3.53-3.48 (m,

1H), 3.42-3.37 (m, 1H); **<sup>13</sup>C-NMR (100 MHz, CDCl<sub>3</sub>)**:  $\delta$  163.0, 156.0, 152.4, 140.9, 138.5, 137.7, 129.2, 128.6, 127.8, 127.4, 119.7, 119.1, 118.3, 117.0, 113.2, 104.1, 50.5, 38.3; **HRMS (ESI+)**: Calcd. for  $C_{20}H_{14}BrNO_2Na$  ( $[M+Na]^+$ ): 402.0106, Found: 402.0108; **Optical rotation**:  $[\alpha]_D^{22} -5.2$  ( $c$  1.0,  $CHCl_3$ ) for an enantiomerically enriched sample with 97:3 er. The enantiomeric ratio was determined by HPLC analysis using Daicel Chiralpak IB column (90:10 *n*-Hexane/EtOH, 1.0 mL/min, 20 °C, 224 nm,  $\tau_{major} = 15.3$  min,  $\tau_{minor} = 20.5$  min). See Supporting Information: Part B for HPLC chromatograms. The absolute stereochemistry of the product **3ga** was assigned in analogy with **3aa**.

**Compound 3ha:** Purified by silica-gel flash column chromatography (7% EtOAc in petroleum ether); Off-white solid (66 mg, 0.188 mmol, 94% yield); **m.p.** 103-105 °C; **FT-IR (Thin film):**, 2924 (m), 2852 (w), 2362 (m), 2229 (m), 1734 (s), 1540 (m), 1370 (m), 1092 (m); **<sup>1</sup>H-NMR (400 MHz, CDCl<sub>3</sub>):** δ 7.56 (s, 1H), 7.32-7.31 (m, 2H), 7.26-7.22 (m, 4H), 6.18-6.10 (m, 1H), 5.15 (d, *J* = 10.0 Hz, 1H), 5.06 (d, *J* = 16.8 Hz, 1H), 3.75-3.69 (m, 1H), 3.50-3.45 (m, 1H), 3.40-3.35 (m, 1H), 2.50 (s, 3H); **<sup>13</sup>C-NMR (100 MHz, CDCl<sub>3</sub>):** δ 163.1, 156.5, 151.9, 144.8, 141.1, 138.5, 131.6, 129.1, 127.7, 127.4, 125.7, 119.8, 116.9, 116.6, 113.5, 102.9, 50.5, 38.3, 21.0; **HRMS (ESI+):** Calcd. for C<sub>21</sub>H<sub>16</sub>ClNO<sub>2</sub>Na ([M+Na]<sup>+</sup>): 372.0767, Found: 372.0764; **Optical rotation:** [α]<sub>D</sub><sup>21</sup> – 9.8 (*c* 2.0, CHCl<sub>3</sub>) for an enantiomerically enriched sample with 98:2 er. The enantiomeric ratio was determined by HPLC analysis using Daicel Chiralpak IF column (90:10 *n*-Hexane/EtOH, 1.0 mL/min, 20 °C, 300 nm, τ<sub>major</sub> = 20.2 min, τ<sub>minor</sub> = 21.7 min). See Supporting Information: Part B for HPLC chromatograms. The absolute stereochemistry of the product **3ha** was assigned in analogy with **3aa**.

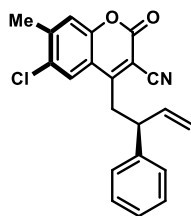

**Compound 3cq:** Purified by silica-gel flash column chromatography (6% EtOAc in petroleum ether); Off-white solid (22 mg, 0.082 mmol, 41% yield); **m.p.** 127-129 °C; **FT-IR (Thin film):** 2924 (m), 2853 (m), 2230 (m), 1721 (s), 1560 (s), 1371 (m), 1083 (m); **<sup>1</sup>H-NMR (400 MHz, CDCl<sub>3</sub>):** δ 7.48 (d, *J* = 8.3 Hz, 1H), 7.45 (s, 1H), 7.28 (d, *J* = 8.5 Hz, 1H), 5.70-5.61 (m, 1H), 5.00 (d, *J* = 10.1 Hz, 1H), 4.82 (d, *J* = 16.9 Hz, 1H), 3.17 (dd, *J* = 12.9, 5.5 Hz, 1H), 3.02 (dd, *J* = 12.7, 9.3 Hz, 1H), 2.47 (s, 3H), 2.41-2.32 (m, 1H), 1.71-1.63 (m, 1H), 1.59-1.50 (m, 1H), 0.97 (t, *J* = 7.3 Hz, 3H); **<sup>13</sup>C-NMR (100 MHz, CDCl<sub>3</sub>):** δ 164.8, 157.2, 151.9, 139.4, 136.2, 135.3, 125.8, 117.8, 117.5, 117.3, 114.1, 102.7, 47.6, 37.5, 28.4, 21.3, 11.9; **HRMS (ESI+):** Calcd. for C<sub>17</sub>H<sub>17</sub>NO<sub>2</sub>Na ([M+Na]<sup>+</sup>): 290.1157, Found: 290.1161; **Optical rotation:** [α]<sub>D</sub><sup>21</sup> +6.5 (*c* 1.0, CHCl<sub>3</sub>) for an enantiomerically enriched sample with 96:4 er. The enantiomeric ratio was determined by HPLC analysis using Phenomenex Cellulose-1 column (99:1 *n*-Hexane/EtOH, 1.0 mL/min, 20 °C, 365 nm, τ<sub>minor</sub> = 20.1 min, τ<sub>major</sub> = 22.3 min). See Supporting Information: Part B for HPLC chromatograms. The absolute stereochemistry of the product **3cq** was assigned in analogy with **3aa**.

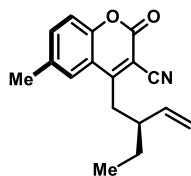

**Compound 3ia:** Purified by silica-gel flash column chromatography (4% EtOAc in CH<sub>2</sub>Cl<sub>2</sub>); Off-white solid (52 mg, 0.163 mmol, 81% yield); **m.p.** 152-154 °C; **FT-IR (Thin film):** 3399 (br), 2920 (m), 1710 (s), 1602 (s), 1452 (m), 1018 (s); **<sup>1</sup>H-NMR (400 MHz, CDCl<sub>3</sub>):** δ 7.72 (d, *J* = 8.0 Hz, 1H), 7.61-7.57 (m, 1H), 7.35-7.31 (m, 2H), 7.29-7.25 (m, 2H), 7.22-7.20 (m, 1H), 7.17-7.15 (m, 2H), 6.65 (bs, 1H), 6.11 (ddd, *J* = 17.5, 10.1, 7.7 Hz, 1H), 5.89 (bs, 1H), 5.07-5.00 (m, 2H), 3.88 (dd, *J* = 12.5, 7.1 Hz, 1H), 3.72-3.67 (m, 1H), 3.58 (dd, *J* = 12.4, 7.5 Hz, 1H); **<sup>13</sup>C-NMR (100 MHz, CDCl<sub>3</sub>):** δ 166.0, 159.9, 157.1, 153.0, 142.5, 139.8, 133.1, 128.8, 127.8, 127.1, 126.2, 124.9,

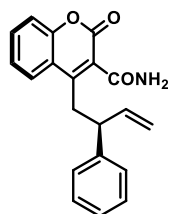

121.0, 119.2, 117.4, 115.6, 50.4, 35.0; **HRMS (ESI+)**: Calcd. for C<sub>20</sub>H<sub>17</sub>NO<sub>3</sub>Na ([M+Na]<sup>+</sup>): 342.1106, Found: 342.1105; **Optical rotation**: [α]<sub>D</sub><sup>21</sup> -30.5 (*c* 1.0, CHCl<sub>3</sub>) for an enantiomerically enriched sample with 98:2 er. The enantiomeric ratio was determined by HPLC analysis using Daicel Chiralpak IA column (75:25 *n*-Hexane/EtOH, 1.0 mL/min, 20 °C, 284 nm, τ<sub>minor</sub> = 17.7 min, τ<sub>major</sub> = 21.7 min). See Supporting Information: Part B for HPLC chromatograms. The absolute stereochemistry of the product **3ia** was assigned in analogy with **3aa**.

**Compound 3ja**: Purified by silica-gel flash column chromatography (10% EtOAc in petroleum

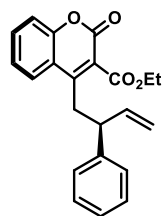

ether); Yellow thick oil (56 mg, 0.160 mmol, 80% yield); **FT-IR (Thin film)**: 2924 (w), 2852 (w), 2362 (w), 1722 (s), 1606 (m), 1243 (s), 1028 (m); **<sup>1</sup>H-NMR (400 MHz, CDCl<sub>3</sub>)**: δ 7.60-7.54 (m, 2H), 7.36-7.23 (m, 5H), 7.18 (d, *J* = 7.7 Hz, 2H), 6.10-6.01 (m, 1H), 5.06 (d, *J* = 10.2 Hz, 1H), 4.99 (d, *J* = 17.0 Hz, 1H), 4.42-4.36 (m, 1H), 4.33-4.27 (m, 1H), 3.74-3.69 (m, 1H), 3.39-3.28 (m, 2H), 1.36 (t, *J* = 7.7 Hz, 2H); **<sup>13</sup>C-NMR (100 MHz, CDCl<sub>3</sub>)**: δ 164.9, 158.0, 153.3, 152.4, 142.3, 139.4, 132.7, 128.9, 127.5, 127.2, 125.9, 124.6, 122.0, 118.5, 117.5, 116.0, 62.2, 49.9, 35.5, 14.2; **HRMS (ESI+)**: Calcd. for C<sub>22</sub>H<sub>20</sub>O<sub>4</sub>Na ([M+Na]<sup>+</sup>): 371.1259, Found: 371.1258; **Optical rotation**: [α]<sub>D</sub><sup>20</sup> -1.2 (*c* 1.0, CHCl<sub>3</sub>) for an enantiomerically enriched sample with 97.5:2.5 er. The enantiomeric ratio was determined by HPLC analysis using Daicel Chiralpak IA column (90:10 *n*-Hexane/EtOH, 1.0 mL/min, 20 °C, 320 nm, τ<sub>major</sub> = 9.0 min, τ<sub>minor</sub> = 11.1 min). See Supporting Information: Part B for HPLC chromatograms. The absolute stereochemistry of the product **3ja** was assigned in analogy with **3aa**.

**Compound 3ka**: Purified by silica-gel flash column chromatography (8% EtOAc in petroleum

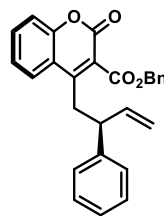

ether); Yellow thick oil (70 mg, 0.170 mmol, 85% yield); **FT-IR (Thin film)**: 2923 (w), 1722 (s), 1605 (m), 1452 (m), 1022 (m); **<sup>1</sup>H-NMR (400 MHz, CDCl<sub>3</sub>)**: δ 7.58-7.53 (m, 2H), 7.48-7.46 (m, 2H), 7.40-7.33 (m, 4H), 7.29-7.23 (m, 3H), 7.19-7.16 (m, 1H), 7.05-7.03 (m, 2H), 5.85 (ddd, *J* = 17.0, 10.1, 7.0 Hz, 1H), 5.39 (d, *J* = 12.2 Hz, 1H), 5.28 (d, *J* = 12.1 Hz, 1H), 4.94 (d, *J* = 10.1 Hz, 1H), 4.86 (d, *J* = 16.9 Hz, 1H), 3.64-3.59 (m, 1H), 3.30-3.25 (m, 1H), 3.24-3.20 (m, 1H); **<sup>13</sup>C-NMR (100 MHz, CDCl<sub>3</sub>)**: δ 164.7, 157.9, 153.3, 152.8, 142.3, 139.2, 135.2, 132.8, 128.9, 128.8, 128.7, 128.6, 127.4, 127.1, 125.8, 124.6, 121.7, 118.4, 117.5, 116.1, 67.9, 49.9, 35.4; **HRMS (ESI+)**: Calcd. for C<sub>27</sub>H<sub>22</sub>O<sub>4</sub>Na ([M+Na]<sup>+</sup>): 433.1416, Found: 433.1413; **Optical rotation**: [α]<sub>D</sub><sup>21</sup> +13.4 (*c* 2.0, CHCl<sub>3</sub>) for an enantiomerically enriched sample with 98:2 er. The enantiomeric ratio was determined by HPLC analysis using Daicel Chiralpak IA column (90:10 *n*-Hexane/EtOH, 1.0 mL/min, 20 °C, 306 nm, τ<sub>major</sub> = 11.7 min, τ<sub>minor</sub> = 13.9 min). See Supporting Information: Part B for HPLC chromatograms. The absolute stereochemistry of the product **3ka** was assigned in analogy with **3aa**.

H. Procedure for the preparation of **3ma**: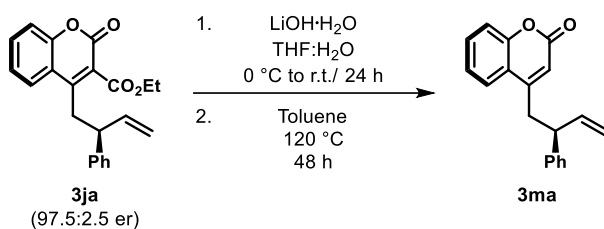

In a 10 mL round-bottom flask, **3ja** (51 mg, 0.147 mmol, 1.0 equiv.) was taken in 1 mL of a 1:1 mixture of THF and H<sub>2</sub>O, and cooled to 0 °C. To this, was added LiOH·H<sub>2</sub>O (31 mg, 0.735 mmol, 5.0 equiv.), warmed to r.t. and the resulting solution was stirred for 24 h. The clear yellow solution was then diluted with 1 M HCl (1 mL) and Et<sub>2</sub>O (5 mL). Organic phase was separated from the aqueous layer. The aqueous layer was extracted with Et<sub>2</sub>O (3 × 5 mL). The combined organic layer was washed with brine (5 mL), dried over anh. Na<sub>2</sub>SO<sub>4</sub> and concentrated under reduced pressure to obtain yellow oil. This residue was subjected for the next step without further purification.

In an oven dried 10 mL round-bottom flask, equipped with a reflux condenser, the residue from the above step was taken in 2 mL absolute toluene under argon. The resulting solution was refluxed at 120 °C for 48 h. Solvent was removed under reduced pressure and the residue was purified by silica-gel flash column chromatography (3% EtOAc in petroleum ether) to obtain **3ma** as a colorless thick oil (24 mg, 0.087 mmol, 60% yield over 2 steps); **FT-IR (Thin film)**: 2923 (w), 2350 (w), 1723 (s), 1608 (m), 1445 (m), 1179 (m); **<sup>1</sup>H-NMR (400 MHz, CDCl<sub>3</sub>)**: δ 7.63 (d, *J* = 8.0 Hz, 1H), 7.55-7.51 (m, 1H), 7.35-7.28 (m, 4H), 7.25-7.22 (m, 1H), 7.18 (d, *J* = 7.5 Hz, 2H), 6.09 (s, 1H), 6.07-6.00 (m, 1H), 5.12 (d, *J* = 10.2 Hz, 1H), 5.04 (d, *J* = 17.0 Hz, 1H), 3.73-3.67 (m, 1H), 3.22-3.17 (m, 1H), 3.16-3.11 (m, 1H); **<sup>13</sup>C-NMR (100 MHz, CDCl<sub>3</sub>)**: δ 160.7, 153.9, 153.5, 142.3, 140.0, 131.8, 129.0, 127.5, 127.2, 124.4, 124.3, 119.3, 117.6, 115.9, 115.8, 48.5, 37.9; **HRMS (ESI<sup>+</sup>)**: Calcd. for C<sub>19</sub>H<sub>16</sub>O<sub>2</sub>Na ([M+Na]<sup>+</sup>): 299.1048, Found: 299.1054; **Optical rotation**: [α]<sub>D</sub><sup>21</sup> -39.9 (*c* 1.0, CHCl<sub>3</sub>) for an enantiomerically enriched sample with 97.5:2.5 er. The enantiomeric ratio was determined by HPLC analysis using Daicel Chiralpak IB column (99:1 *n*-Hexane/EtOH, 1.0 mL/min, 20 °C, 208 nm, τ<sub>major</sub> = 17.2 min, τ<sub>minor</sub> = 19.0 min). See Supporting Information: Part B for HPLC chromatograms.

### I. Large scale synthesis of **3aa**:

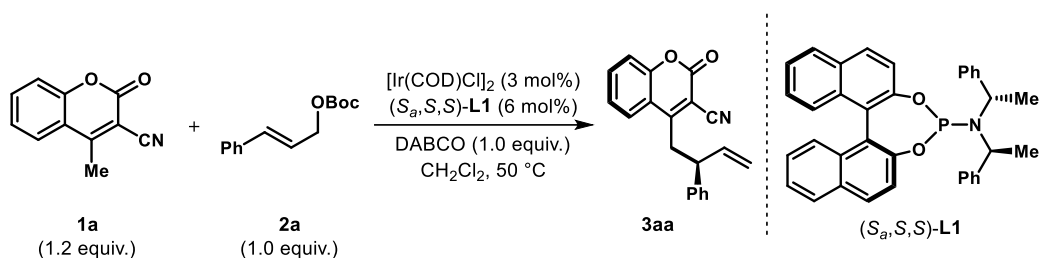

In an oven dried 25 mL 2-necked round-bottom flask, equipped with a reflux condenser,  $[\text{Ir}(\text{COD})\text{Cl}]_2$  (101 mg, 0.150 mmol, 3 mol%) and ligand  $(S_a,S,S)\text{-L1}$  (162 mg, 0.300 mmol, 6 mol%) were taken with 12.5 mL of absolute THF under a positive argon pressure followed by addition of 7.5 mL dry *n*-PrNH<sub>2</sub>. The solution was heated at 50 °C for 30 min, after which all volatiles were removed under vacuum to obtain a yellow solid. To this, coumarin **1a** (1.11 g, 6.000 mmol, 1.2 equiv.) and DABCO (561 mg, 5.000 mmol, 1.0 equiv.) were introduced under a positive argon pressure followed by 12.5 mL of absolute  $\text{CH}_2\text{Cl}_2$  and the suspension was stirred at 50 °C for 5 min. After 5 min, a solution of allyl carbonate **2a** (1.17 g, 5.000 mmol, 1.0 equiv.) in 5.0 mL absolute  $\text{CH}_2\text{Cl}_2$  was added to it. The resulting mixture was purged with argon and the reaction was refluxed at 50 °C until TLC (20% EtOAc in petroleum ether) revealed complete consumption of **2a**. After 36 h, the reaction mixture was allowed to attain ambient temperature, diluted with 10 mL of  $\text{CH}_2\text{Cl}_2$  and 10 mL 1 N HCl solution. Organic layer was separated from the aqueous layer. The aqueous layer was extracted with  $\text{CH}_2\text{Cl}_2$  (3 × 10 mL). Combined organic layer was washed with brine (20 mL), dried over anh.  $\text{Na}_2\text{SO}_4$  and concentrated under reduced pressure to obtain a reddish-brown oil. This oil was purified by silica-gel flash column chromatography (8-9% EtOAc in petroleum ether) to obtain **3aa** as off-white solid (1.32 g, 4.380 mmol, 88% yield) with 95:5 er. Isolated **3aa** was further recrystallized from EtOH to obtain 1.0 g of **3aa** with 98:2 er.

### J. Procedure for the retro-Knoevenagel/hydrolysis reaction of **3aa**:

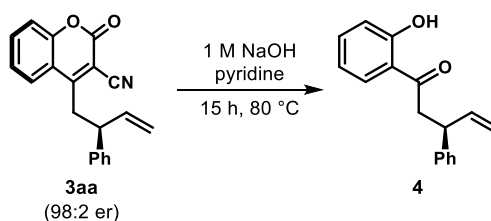

In a 5 mL round-bottom flask, **3aa** (30 mg, 0.100 mmol, 1.0 equiv.) was suspended in 1 M NaOH solution (1 mL, 1.000 mmol, 10.0 equiv.). To this was added pyridine (9  $\mu\text{L}$ , 0.110 mmol, 1.1 equiv.), purged with argon, sealed the flask with glass stopper and heated the reaction mixture at 80 °C for 15 h. The clear yellow solution was allowed to attain ambient temperature,

diluted with 1 M HCl (1 mL) and EtOAc (10 mL). Organic phase was separated from the aqueous layer. The aqueous layer was extracted with EtOAc (3 × 5 mL). The combined organic layer was washed with brine (5 mL), dried over anhydrous Na<sub>2</sub>SO<sub>4</sub> and concentrated under reduced pressure. The residue was purified by silica-gel flash column chromatography (2% EtOAc in petroleum ether) to obtain **4** as a colorless thick oil (16 mg, 0.063 mmol, 63% yield); **FT-IR (Thin film)**: 3029 (br), 2920 (w), 1640 (s), 1488 (s), 1447 (s), 1156 (m), 991 (m); **<sup>1</sup>H-NMR (400 MHz, CDCl<sub>3</sub>)**: δ 12.25 (s, 1H), 7.78 (d, *J* = 8.0 Hz, 1H), 7.48-7.44 (m, 1H), 7.34-7.21 (m, 5H), 6.97 (d, *J* = 8.4 Hz, 1H), 6.91-6.87 (m, 1H), 6.10-6.01 (m, 1H), 5.11-5.08 (m, 1H), 5.08-5.03 (m, 1H), 4.15-4.09 (m, 1H), 3.46 (dd, *J* = 16.5, 7.5 Hz, 1H), 3.39 (dd, *J* = 16.5, 6.8 Hz, 1H); **<sup>13</sup>C-NMR (100 MHz, CDCl<sub>3</sub>)**: δ 204.5, 162.7, 142.8, 140.4, 136.5, 130.0, 128.8, 127.8, 126.9, 119.6, 119.0, 118.7, 115.1, 44.7, 43.7; **HRMS (ESI<sup>+</sup>)**: Calcd. for C<sub>17</sub>H<sub>16</sub>O<sub>2</sub>Na ([M+Na]<sup>+</sup>): 275.1048, Found: 275.1050; **Optical rotation**: [α]<sub>D</sub><sup>21</sup> -27.1 (*c* 1.0, CHCl<sub>3</sub>) for an enantiomerically enriched sample with 98:2 er. The enantiomeric ratio was determined by HPLC analysis using Daicel Chiralpak AS-H column (90:10 *n*-Hexane/EtOH, 1.0 mL/min, 20 °C, 254 nm, τ<sub>major</sub> = 4.3 min, τ<sub>minor</sub> = 4.7 min). See Supporting Information: Part B for HPLC chromatograms.

#### K. Procedure for the epoxidation of **3aa**:

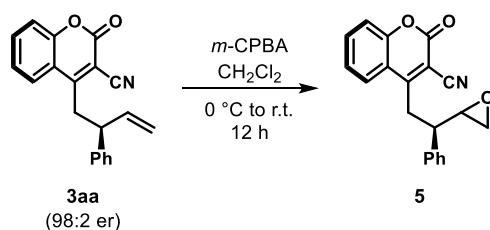

In an oven and vacuum-dried 10 mL round-bottom flask, **3aa** (30 mg, 0.100 mmol, 1.0 equiv.) was taken in 0.6 mL of abs. CH<sub>2</sub>Cl<sub>2</sub> and cooled it to 0 °C. To this was added *m*-CPBA (41 mg, 55% assay, 0.130 mmol, 1.3 equiv.) and the resulting suspension was stirred at r.t. under argon. After 12 h, reaction mixture was diluted with 2 mL of sat. Na<sub>2</sub>S<sub>2</sub>O<sub>3</sub> solution and 5 mL of CH<sub>2</sub>Cl<sub>2</sub>. Organic phase was separated from aqueous phase, aqueous phase was extracted with additional CH<sub>2</sub>Cl<sub>2</sub> (2 × 5 mL). Combined organic phase was washed with sat. NaHCO<sub>3</sub> solution (5 mL) and brine (5 mL), dried over anhydrous Na<sub>2</sub>SO<sub>4</sub> and concentrated under reduced pressure. The crude reaction mixture (with 1.8:1 dr, as obtained from <sup>1</sup>H-NMR) was purified by silica-gel flash column chromatography (2-3% EtOAc in CH<sub>2</sub>Cl<sub>2</sub>) to obtain **5** as white solid (31 mg, 0.098 mmol, 98% yield); **FT-IR (Thin film)**: 3063 (w), 2922 (m), 2852 (w), 2230 (m), 1734 (s), 1602 (s), 1557 (m), 1451 (m), 1367 (m), 1079 (m); **<sup>1</sup>H-NMR (400 MHz, CDCl<sub>3</sub>)**: Signals corresponding to the major diastereomer: δ 7.78 (d, *J* = 7.1 Hz, 1H), 7.72-7.69 (m, 1H), 7.42-7.29 (m, 5H), 7.22-7.20 (m, 2H), 3.78 (dd, *J* = 13.1, 6.5 Hz, 1H), 3.54 (dd, *J* = 13.0, 8.0 Hz, 1H),



3.41 (ddd,  $J = 6.4, 3.6, 2.7$  Hz, 1H), 2.80-2.78 (m, 1H), 2.70 (dd,  $J = 15.1, 8.2$  Hz, 1H), 2.57 (dd,  $J = 4.5, 8.2$  Hz, 1H); Representative signals corresponding to the minor diastereomer:  $\delta$  7.72-7.67 (m, 2H), 7.42-7.29 (m, 5H), 7.22-7.20 (m, 2H), 3.56-3.51 (m, 1H), 3.38-3.35 (m, 1H), 3.29 (dd,  $J = 12.9, 8.3$  Hz, 1H), 3.18 (dd,  $J = 13.9, 5.9$  Hz, 1H), 2.89 (t,  $J = 4.21$  Hz, 1H), 2.63 (dd,  $J = 4.4, 2.6$  Hz, 1H);  **$^{13}\text{C-NMR}$  (100 MHz,  $\text{CDCl}_3$ )**:  $\delta$  163.8, 163.4, 156.7, 156.6, 153.7, 138.1, 138.0, 135.4, 135.1, 129.3, 129.1, 128.3, 128.3, 128.1, 127.8, 126.2, 126.0, 125.7, 125.6, 118.1, 117.5, 117.3, 113.6, 113.3, 103.1, 55.6, 54.2, 50.7, 47.6, 47.4, 46.0, 36.9, 34.4; **HRMS (ESI+)**: Calcd. for  $\text{C}_{20}\text{H}_{15}\text{NO}_3\text{Na}$  ( $[\text{M}+\text{Na}]^+$ ): 340.0950, Found: 340.0952; **Optical rotation**:  $[\alpha]_{\text{D}}^{21} -86.5$  ( $c$  1.0,  $\text{CHCl}_3$ ) for an enantiomerically enriched sample ( $dr = 1.8:1$ ) with 98:2 er for each of the diastereomer. The enantiomeric ratio was determined by HPLC analysis using Daicel Chiralpak IA column (90:10  $n$ -Hexane/EtOH, 1.0 mL/min, 20 °C, 320 nm, for major diastereomer  $\tau_{\text{minor}} = 31.2$  min,  $\tau_{\text{major}} = 33.1$  min, and for minor diastereomer  $\tau_{\text{minor}} = 45.4$  min,  $\tau_{\text{major}} = 51.8$  min). See Supporting Information: Part B for HPLC chromatograms.

#### L. Procedure for the selective reduction of the allylic double bond of **3aa**:

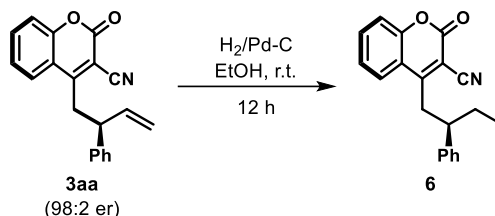

In an oven and vacuum-dried 10 mL two-necked round-bottom flask, a solution of **3aa** (90.4 mg, 0.300 mmol, 1.0 equiv.) in EtOH (3 mL), 10% Pd-C (16 mg, 0.015 mmol, 0.05 equiv.) was added. The resulting mixture was degassed and stirred under  $\text{H}_2$  balloon pressure for 12 h at r.t. The reaction mixture was filtered over Celite® and washed with  $\text{CH}_2\text{Cl}_2$ . The filtrate was concentrated under reduced pressure to obtain crude. The crude reaction mixture was purified by silica-gel flash column chromatography (6-7% EtOAc in petroleum ether) to obtain **6** as white solid (86 mg, 0.283 mmol, 94% yield); **m.p.** 132-134 °C; **FT-IR (Thin film)**: 2963 (w), 2922 (m), 2231 (w), 1738 (s), 1599 (m), 1453 (s), 1022 (m);  **$^1\text{H-NMR}$  (400 MHz,  $\text{CDCl}_3$ )**:  $\delta$  7.68-7.63 (m, 2H), 7.38-7.34 (m, 2H), 7.28-7.24 (m, 2H), 7.21-7.17 (m, 1H), 7.13-7.11 (m, 2H), 3.46 (dd,  $J = 12.9, 6.9$  Hz, 1H), 3.29 (dd,  $J = 12.9, 8.0$  Hz, 1H), 2.98-2.91 (m, 1H), 1.96-1.84 (m, 2H), 0.83 (t,  $J = 7.3$  Hz, 3H);  **$^{13}\text{C-NMR}$  (100 MHz,  $\text{CDCl}_3$ )**:  $\delta$  165.0, 156.8, 153.5, 141.8, 135.1, 128.8, 127.5, 127.3, 126.3, 125.3, 117.9, 117.6, 113.7, 102.6, 48.8, 39.7, 28.7, 12.2; **HRMS (ESI+)**: Calcd. for  $\text{C}_{20}\text{H}_{17}\text{NO}_2\text{Na}$  ( $[\text{M}+\text{Na}]^+$ ): 326.1157, Found: 326.1160; The absolute configurations of **6** was assigned as (*S*) by comparing specific rotation with the known compound.<sup>4</sup> **Optical rotation**:  $[\alpha]_{\text{D}}^{22} -91.7$  ( $c$  0.85,  $\text{CHCl}_3$ ) for an enantiomerically enriched sample with 99:1 er [ $\text{Lit}^4 +78.4$  ( $c$  0.85,  $\text{CHCl}_3$ ) for an enantiomerically enriched sample with 97:3 er]. The enantiomeric ratio was determined by HPLC analysis using Daicel Chiralpak IB

column (90:10 *n*-Hexane/EtOH, 1.0 mL/min, 20 °C, 254 nm,  $\tau_{\text{major}} = 12.3$  min,  $\tau_{\text{minor}} = 13.2$  min). See Supporting Information: Part B for HPLC chromatograms.

### M. Procedure for the base-catalyzed cyclization of **6** with sulfur:

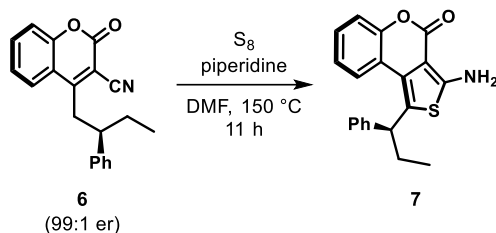

In an oven dried 5 mL round-bottom flask, piperidine (5 mg, 0.060 mmol, 0.6 equiv.) was taken. Then **6** (30 mg, 0.100 mmol, 1.0 equiv.), sulfur (3.2 mg, 0.100 mmol, 1.0 equiv.) and dry DMF (150  $\mu$ L) were added to the flask. Subsequently the flask was purged with argon, sealed with glass stopper and heated in an oil bath at 150 °C for 11 h. The clear brownish yellow solution was cooled down to ambient temperature, diluted with H<sub>2</sub>O (5 mL) and EtOAc (10 mL). Organic phase was separated from the aqueous layer. The aqueous layer was extracted with EtOAc (3  $\times$  5 mL). The combined organic layer was washed with brine (5 mL), dried over anhydrous Na<sub>2</sub>SO<sub>4</sub> and concentrated under reduced pressure. The crude reaction mixture was purified by silica-gel flash column chromatography (7% EtOAc in petroleum ether) to obtain **7** as a yellow thick oil (33 mg, 0.098 mmol, 98% yield); **FT-IR (Thin film)**: 3415 (br), 3333 (br), 2925 (w), 1681 (s), 1591 (s), 1505 (s), 1270 (m), 1211 (s); **<sup>1</sup>H-NMR (400 MHz, CDCl<sub>3</sub>)**:  $\delta$  7.82 (d,  $J = 7.9$  Hz, 1H), 7.34-7.28 (m, 5H), 7.25-7.22 (m, 2H), 7.16-7.12 (m, 1H), 6.26 (br s, 2H), 4.58 (t,  $J = 7.5$  Hz, 1H), 2.14-2.06 (m, 2H), 1.04 (t,  $J = 7.2$  Hz, 1H); **<sup>13</sup>C-NMR (100 MHz, CDCl<sub>3</sub>)**:  $\delta$  162.4, 160.8, 151.8, 143.2, 128.8, 128.5, 127.9, 127.0, 125.6, 125.1, 124.2, 124.1, 119.2, 117.9, 101.6, 46.9, 31.2, 13.1; **HRMS (ESI+)**: Calcd. for C<sub>20</sub>H<sub>17</sub>NO<sub>2</sub>SNa ([M+Na]<sup>+</sup>): 358.0878, Found: 358.0874; The absolute configurations of **7** was assigned as (*S*) by comparing specific rotation with the known compound.<sup>4</sup> **Optical rotation**:  $[\alpha]_{\text{D}}^{22} -68.9$  ( $c$  1.0, CHCl<sub>3</sub>) for an enantiomerically enriched sample with 99:1 er [ $\text{Lit}^4 +12.8$  ( $c$  0.50, CHCl<sub>3</sub>) for an enantiomerically enriched sample with 97:3 er]. The enantiomeric ratio was determined by HPLC analysis using Daicel Chiralpak AS-H column (95:5 *n*-Hexane/*i*-PrOH, 1.0 mL/min, 20 °C, 315 nm,  $\tau_{\text{major}} = 36.3$  min,  $\tau_{\text{minor}} = 45.4$  min). See Supporting Information: Part B for HPLC chromatograms.

**N. Procedure for the cross-metathesis reaction of 3aa:**

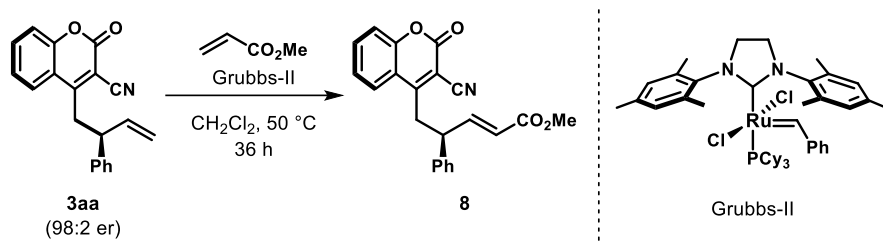

In an oven dried 10 mL 2-necked round-bottom flask, equipped with a reflux condenser, **3aa** (30 mg, 0.100 mmol, 1.0 equiv.) and Grubbs-II (4.3 mg, 0.005 mmol, 0.05 equiv.) were taken in 2 mL of absolute CH<sub>2</sub>Cl<sub>2</sub> under argon and the resulting solution was heated to 50 °C. To this, was added methyl acrylate (53 μL, 0.500 mmol, 5.0 equiv.) at once and the resulting mixture was stirred at 50 °C for 36 h. Solvent was evaporated to obtain a yellow residue. The residue was purified by silica-gel flash column chromatography (2% EtOAc in CH<sub>2</sub>Cl<sub>2</sub>) to obtain **8** as a yellow thick oil (27 mg, 0.075 mmol, 75% yield); **FT-IR (Thin film)**: 2955 (s), 2925 (s), 2854 (s), 2230 (m), 1732 (s), 1602 (s), 1454 (m), 1370 (m); **<sup>1</sup>H-NMR (400 MHz, CDCl<sub>3</sub>)**: δ 7.71-7.67 (m, 1H), 7.62 (d, *J* = 8.1 Hz, 1H), 7.40-7.36 (m, 2H), 7.33-7.22 (m, 4H), 7.20-7.17 (m, 2H), 5.85 (d, *J* = 15.6 Hz, 1H), 3.93-3.87 (m, 1H), 3.72 (s, 3H), 3.59 (dd, *J* = 13.0, 7.3 Hz, 1H), 3.51 (dd, *J* = 12.9, 8.0 Hz, 1H); **<sup>13</sup>C-NMR (100 MHz, CDCl<sub>3</sub>)**: δ 166.2, 162.9, 156.5, 153.7, 147.6, 138.9, 135.4, 129.4, 128.3, 127.7, 125.9, 125.6, 122.5, 118.2, 117.3, 113.3, 103.3, 51.9, 48.7, 37.7; **HRMS (ESI+)**: Calcd. for C<sub>22</sub>H<sub>17</sub>NO<sub>4</sub>Na ([M+Na]<sup>+</sup>): 382.1055, Found: 382.1061; **Optical rotation**: [α]<sub>D</sub><sup>21</sup> -26.2 (*c* 1.0, CHCl<sub>3</sub>) for an enantiomerically enriched sample with 98:2 er. The enantiomeric ratio was determined by HPLC analysis using Daicel Chiralpak IA column (90:10 *n*-Hexane/EtOH, 1.0 mL/min, 20 °C, 302 nm, τ<sub>minor</sub> = 39.2 min, τ<sub>major</sub> = 48.0 min). See Supporting Information: Part B for HPLC chromatograms.
